# Supplementary material for: 7-O-tyrosyl Silybin Derivatives as a Novel Set of Anti-Prostate Cancer Compounds
Source: MDPI journal article supplement (doi:10.3390/antiox13040418), 2024-03-29

## Supporting Information for

### 7-O-tyrosyl silybin derivatives as a novel set of anti-prostate cancer compounds.

Valeria Romanucci<sup>a†</sup>, Rita Pagano<sup>a†</sup>, Kushal Kandhari<sup>b</sup>, Armando Zarrelli<sup>a</sup>, Maria Petrone<sup>a</sup>, Chapla Agarwal<sup>b</sup>, Rajesh Agarwal<sup>b</sup> and Giovanni Di Fabio<sup>a\*</sup>

<sup>a</sup> Department of Chemical Sciences, University of Naples "Federico II", Complesso Monte Sant'Angelo, Via Cintia 4, I-80126 Napoli (NA), Italy.

<sup>b</sup> University of Colorado, Skaggs School of Pharmacy and Pharmaceutical Sciences, Aurora, CO 80045, USA.

† These authors contributed equally to this work.

\* corresponding author: Prof. Giovanni Di Fabio email: difabio@unina.it

---

## Table of contents

|                                                                             | pag. |
|-----------------------------------------------------------------------------|------|
| The $^1\text{H}$ and $^{13}\text{C}$ NMR data for compounds <b>10ab</b>     | 3S   |
| The $^1\text{H}$ and $^{13}\text{C}$ NMR data for compound <b>10a</b>       | 5S   |
| The $^1\text{H}$ and $^{13}\text{C}$ NMR data for compound <b>10b</b>       | 7S   |
| The $^1\text{H}$ and $^{13}\text{C}$ NMR data for compounds <b>11ab</b>     | 9S   |
| The $^1\text{H}$ and $^{13}\text{C}$ NMR data for compound <b>11a</b>       | 11S  |
| The $^1\text{H}$ and $^{13}\text{C}$ NMR data for compound <b>11b</b>       | 13S  |
| The $^1\text{H}$ and $^{13}\text{C}$ NMR data for compounds <b>12ab</b>     | 15S  |
| The $^1\text{H}$ and $^{13}\text{C}$ NMR data for compound <b>12a</b>       | 17S  |
| The $^1\text{H}$ and $^{13}\text{C}$ NMR data for compound <b>12b</b>       | 19S  |
| The $^1\text{H}$ and $^{13}\text{C}$ NMR data for final compound <b>13a</b> | 21S  |
| The $^1\text{H}$ and $^{13}\text{C}$ NMR data for final compound <b>14a</b> | 23S  |
| The $^1\text{H}$ and $^{13}\text{C}$ NMR data for final compound <b>15a</b> | 25S  |

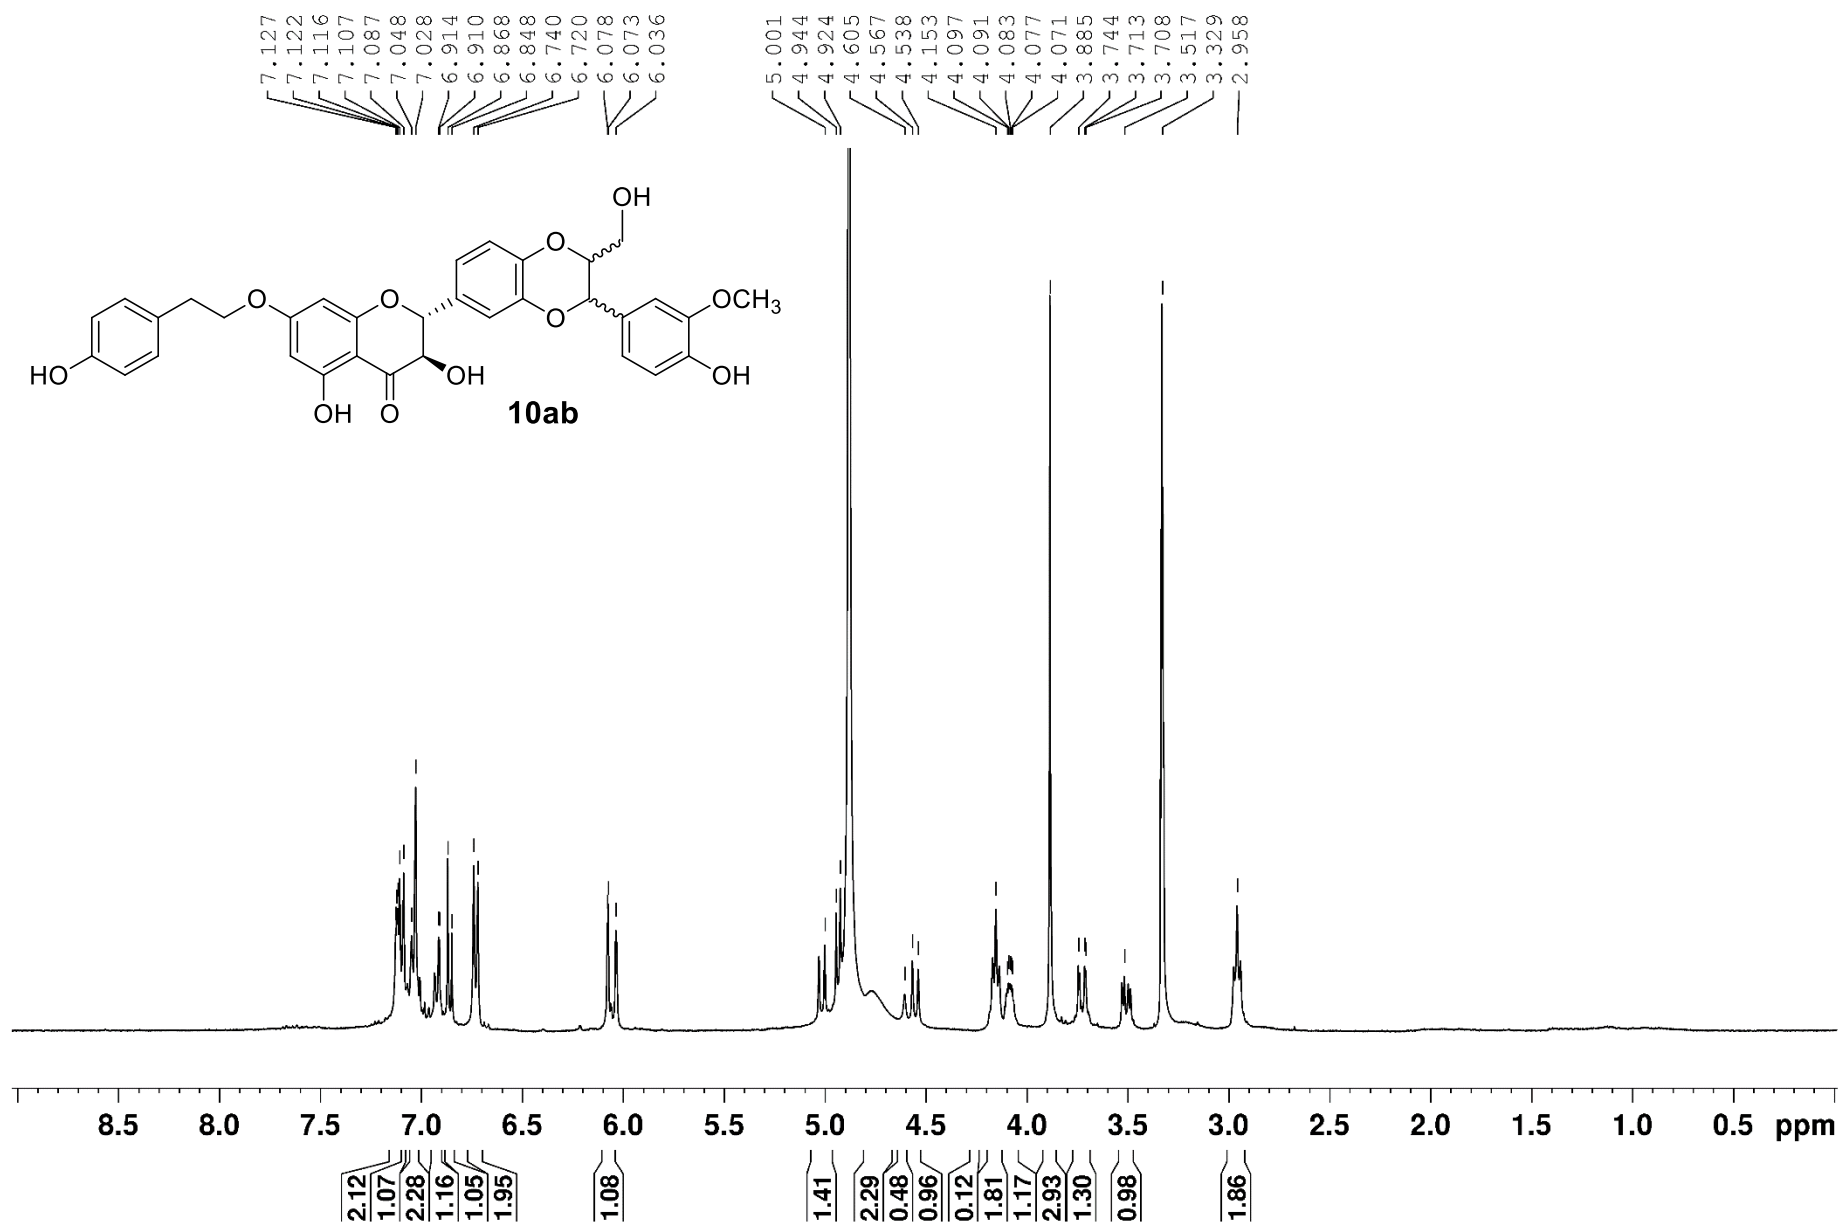

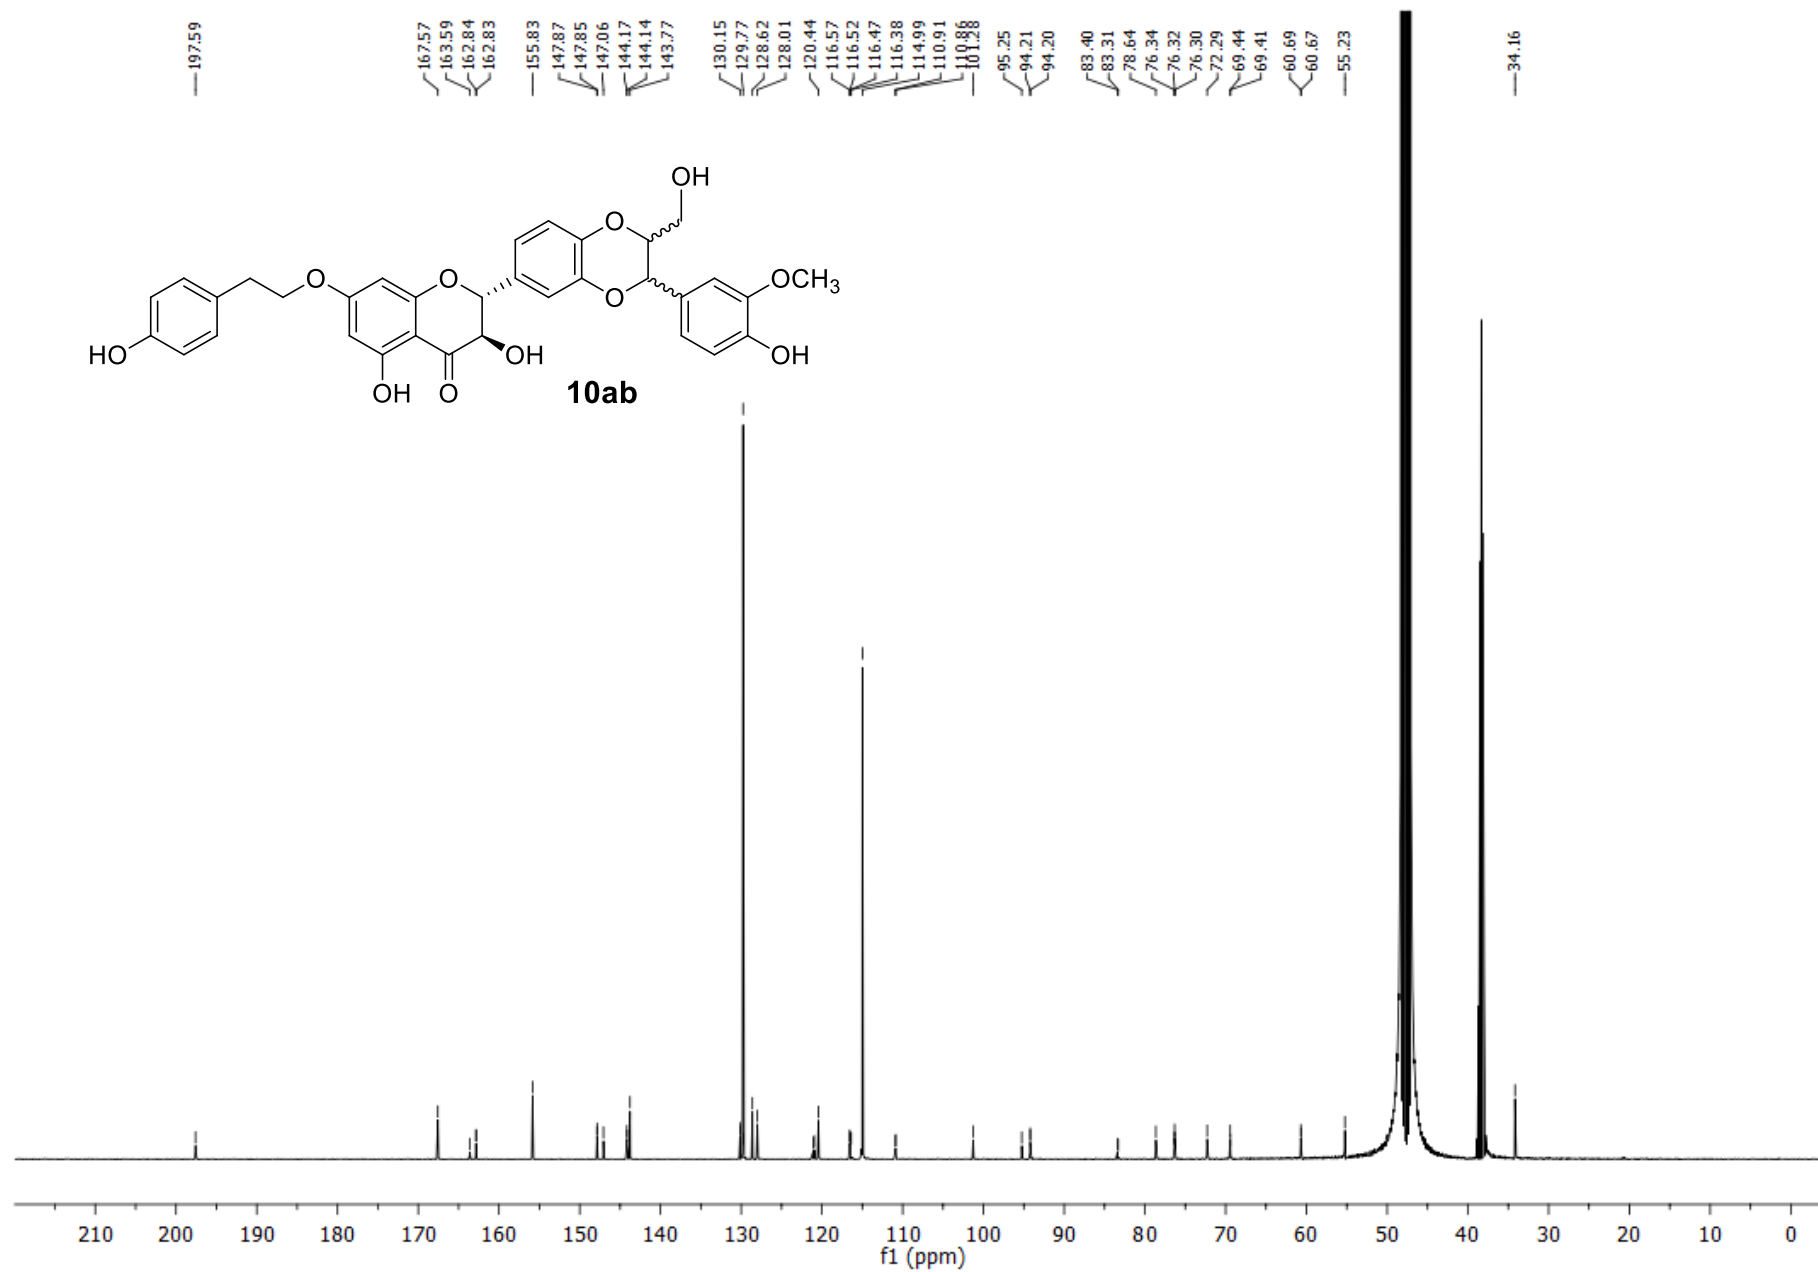

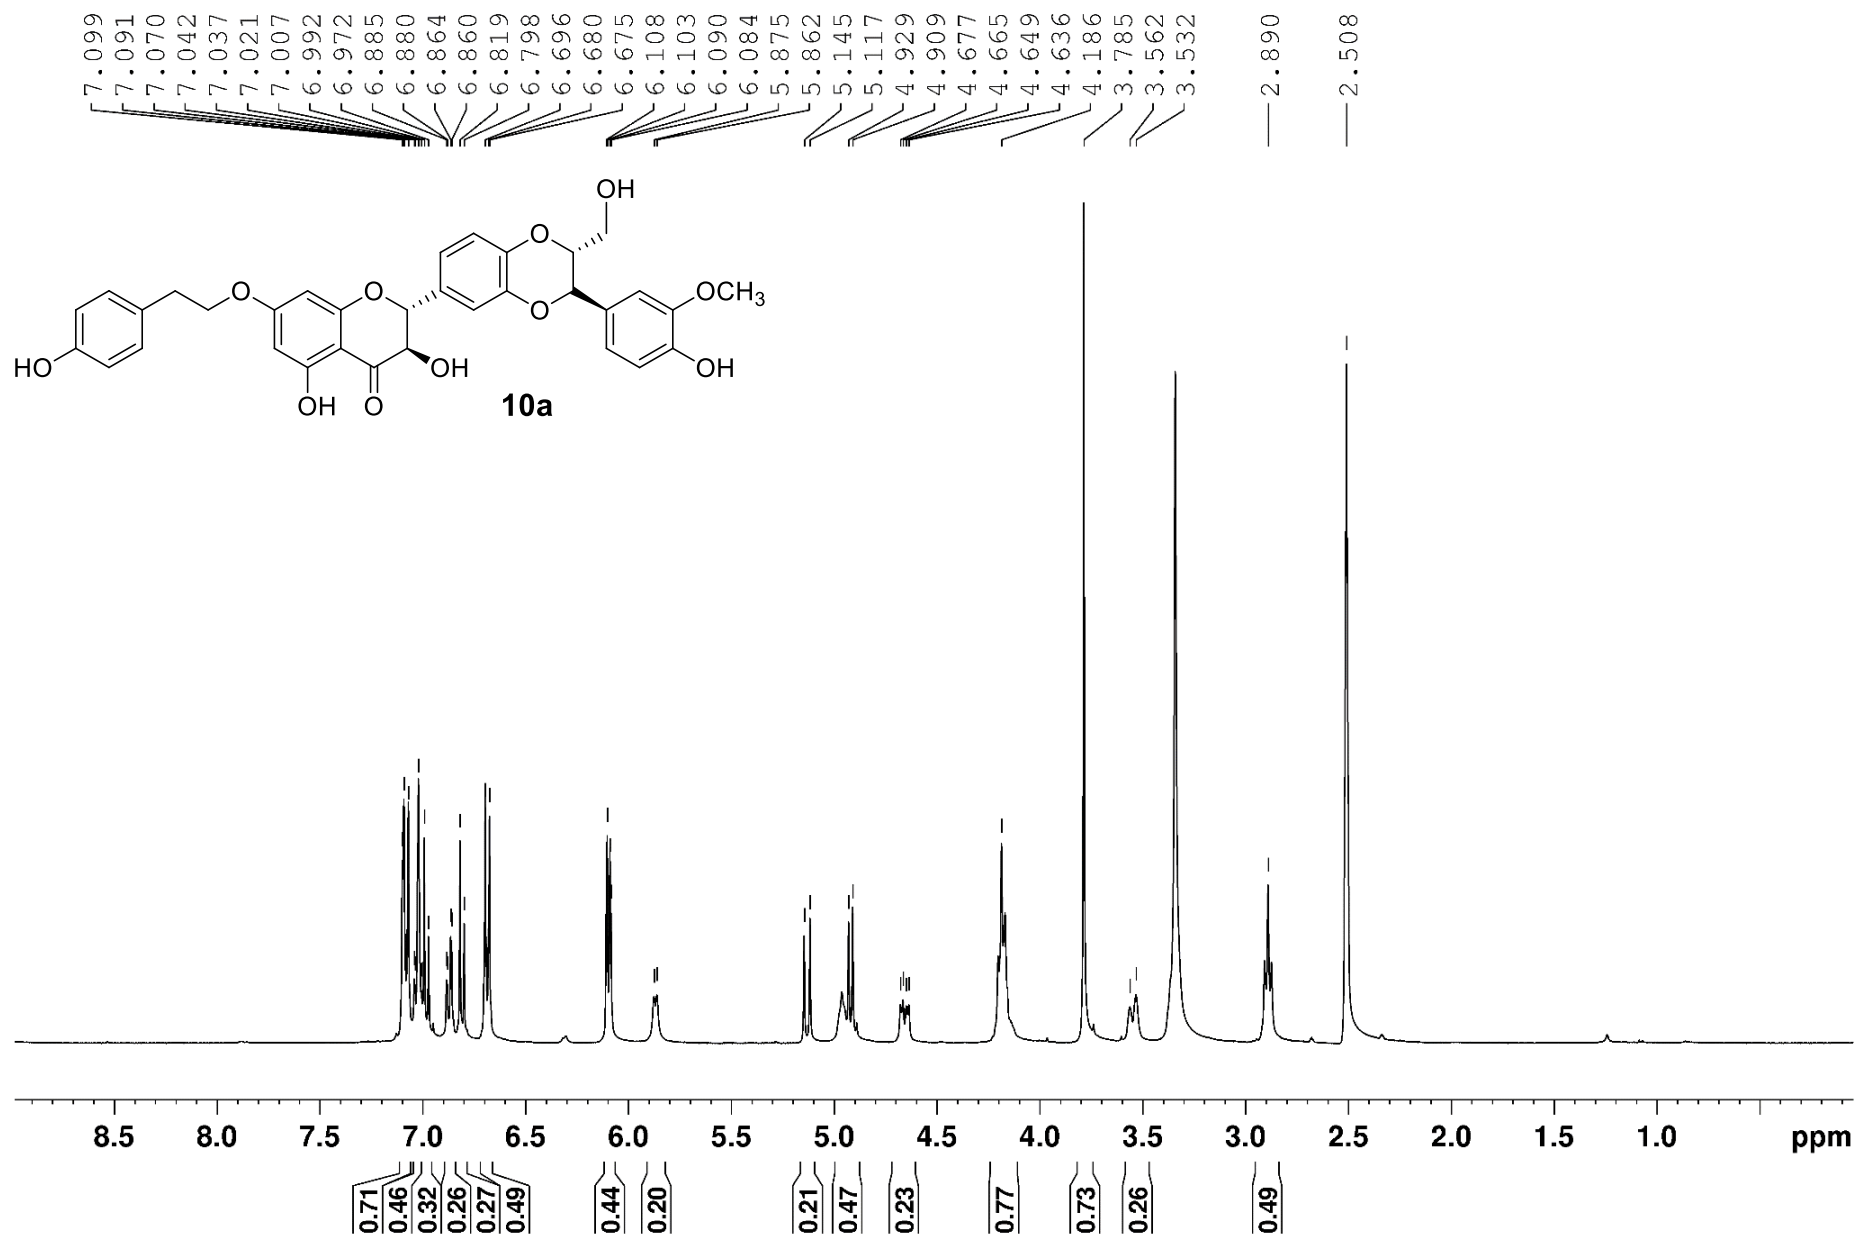

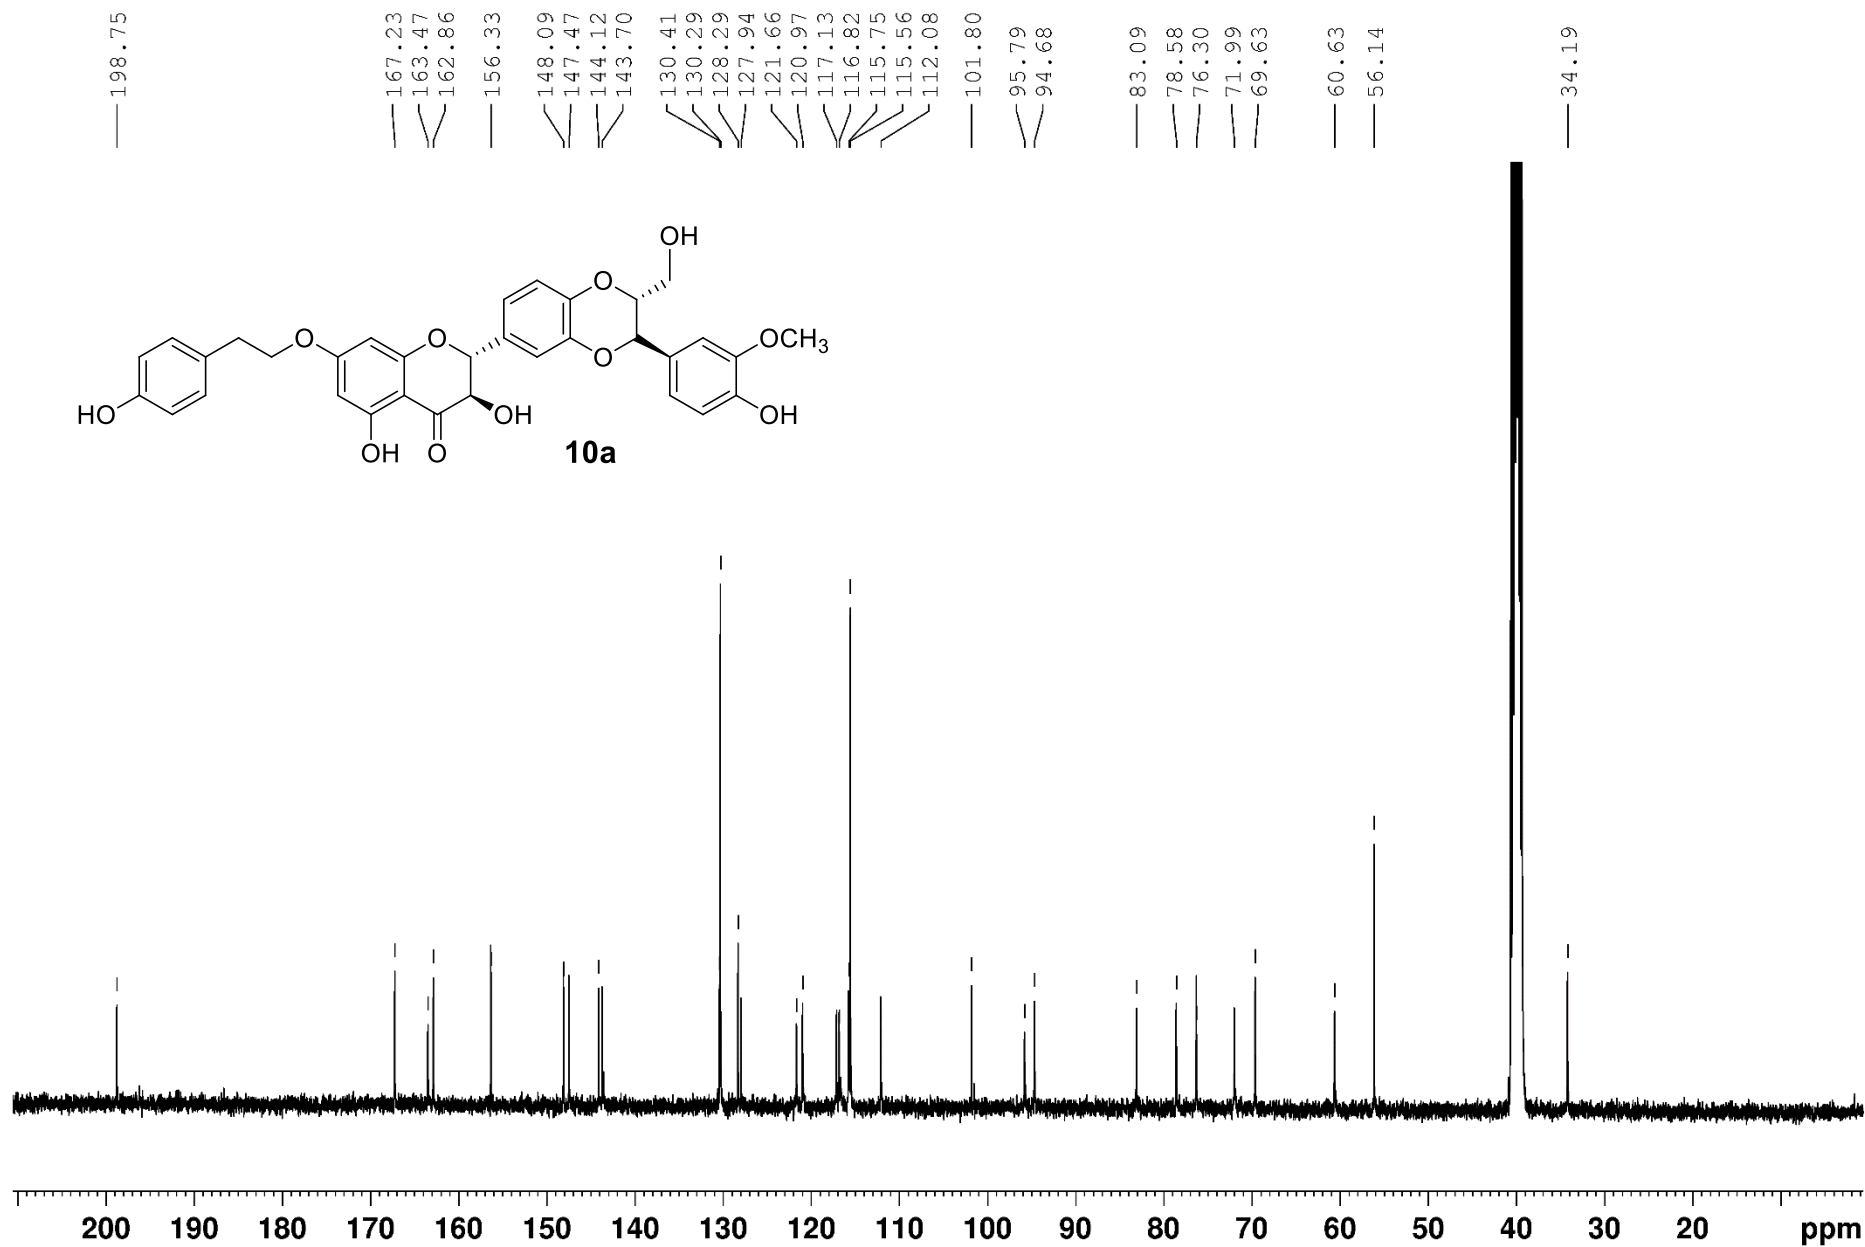

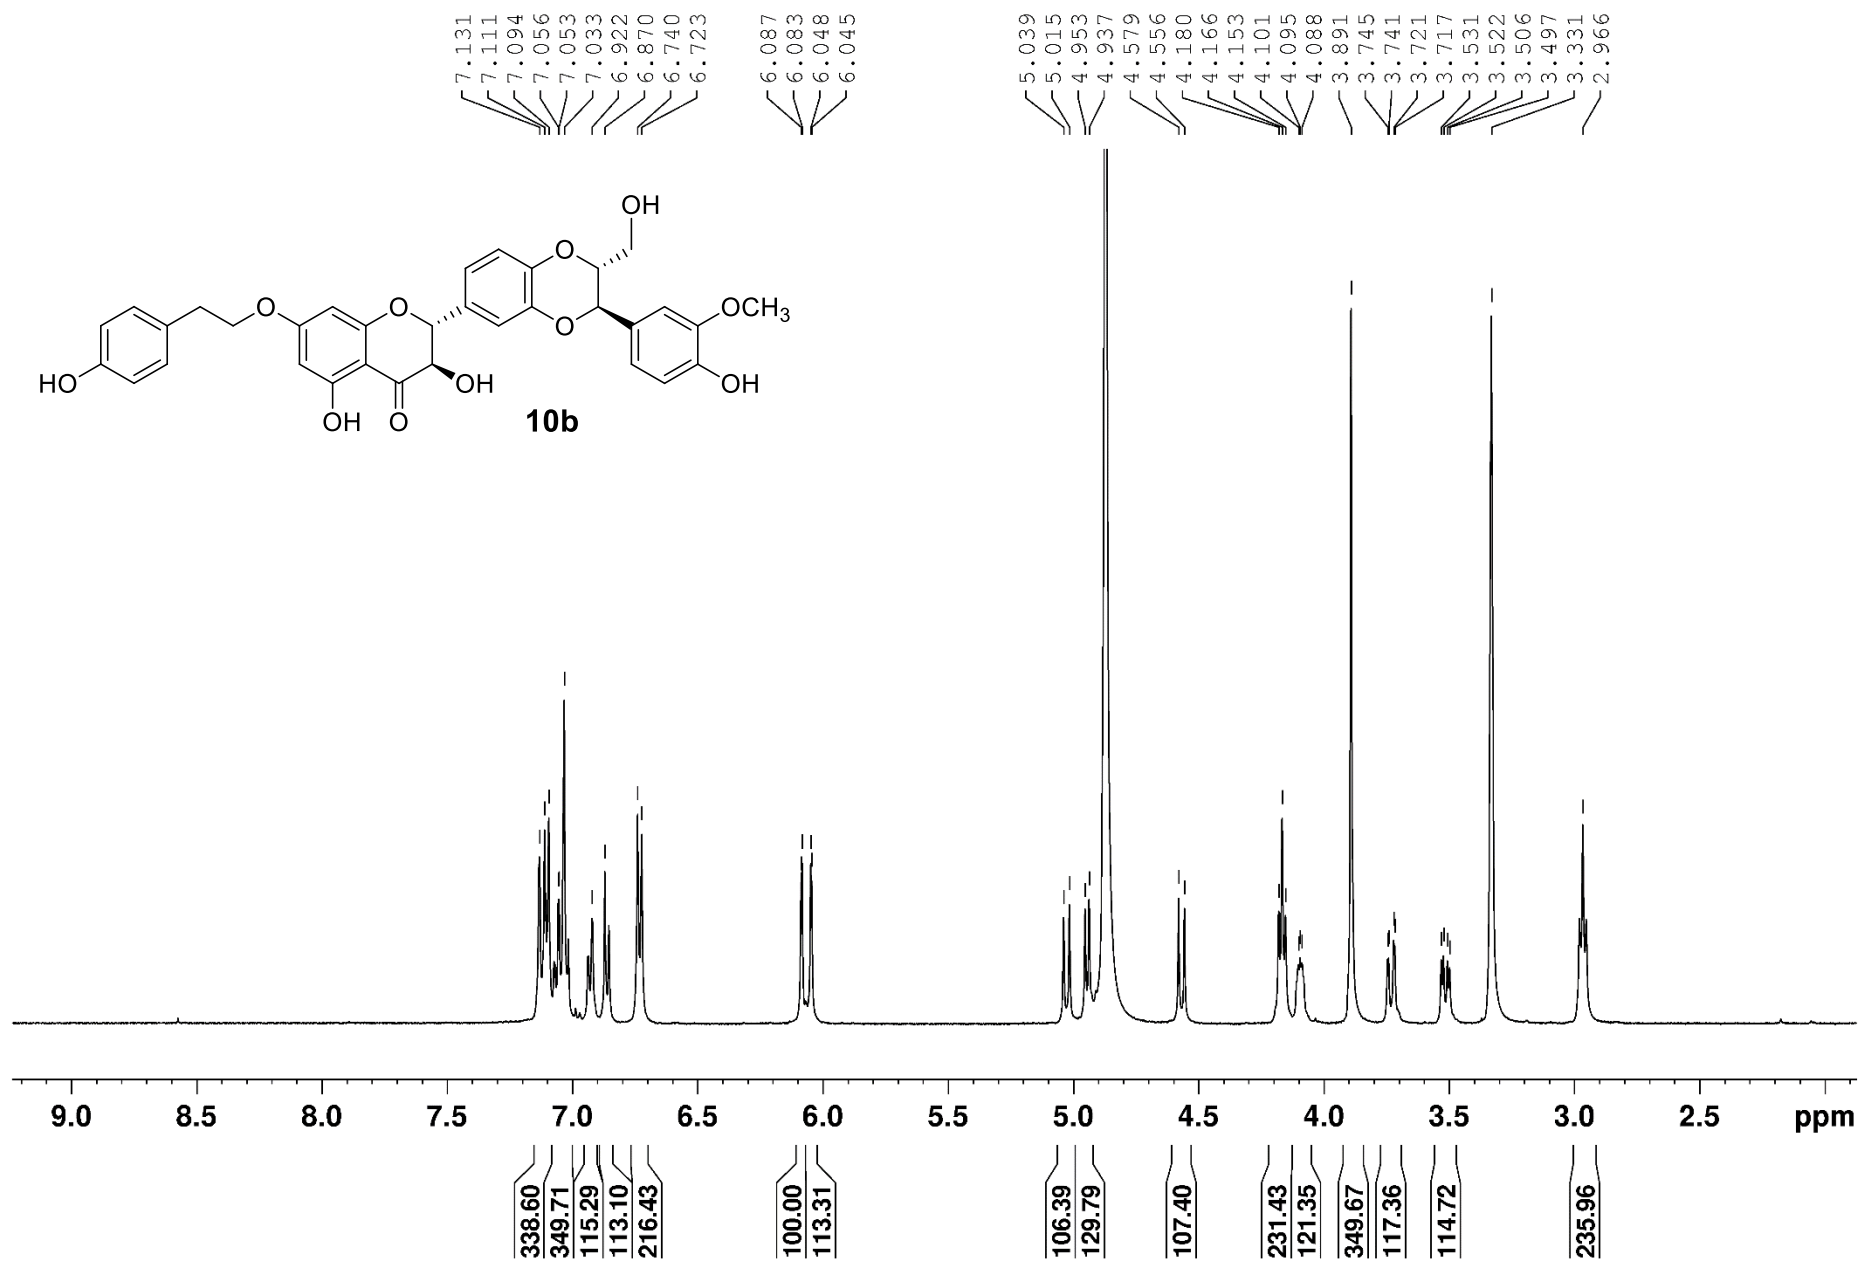

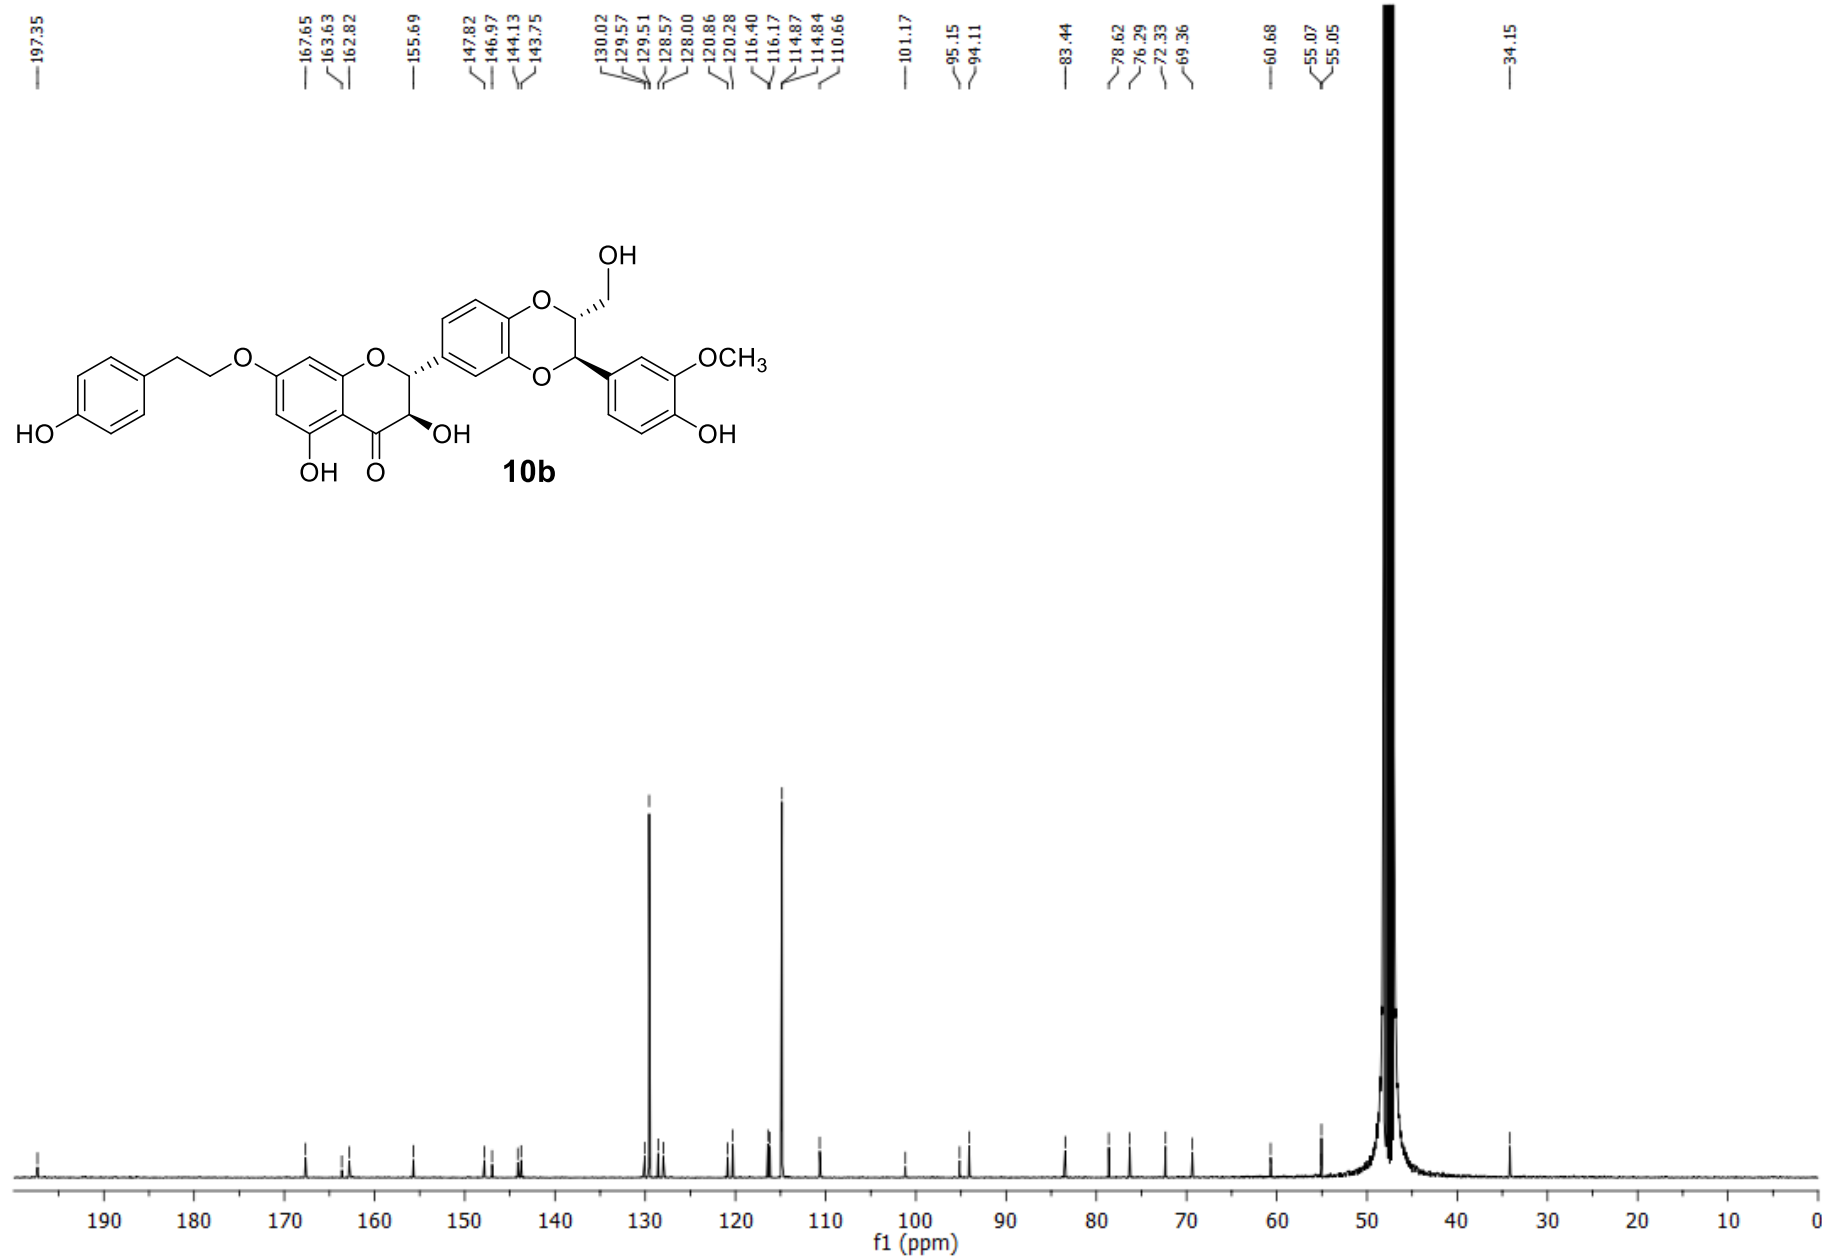



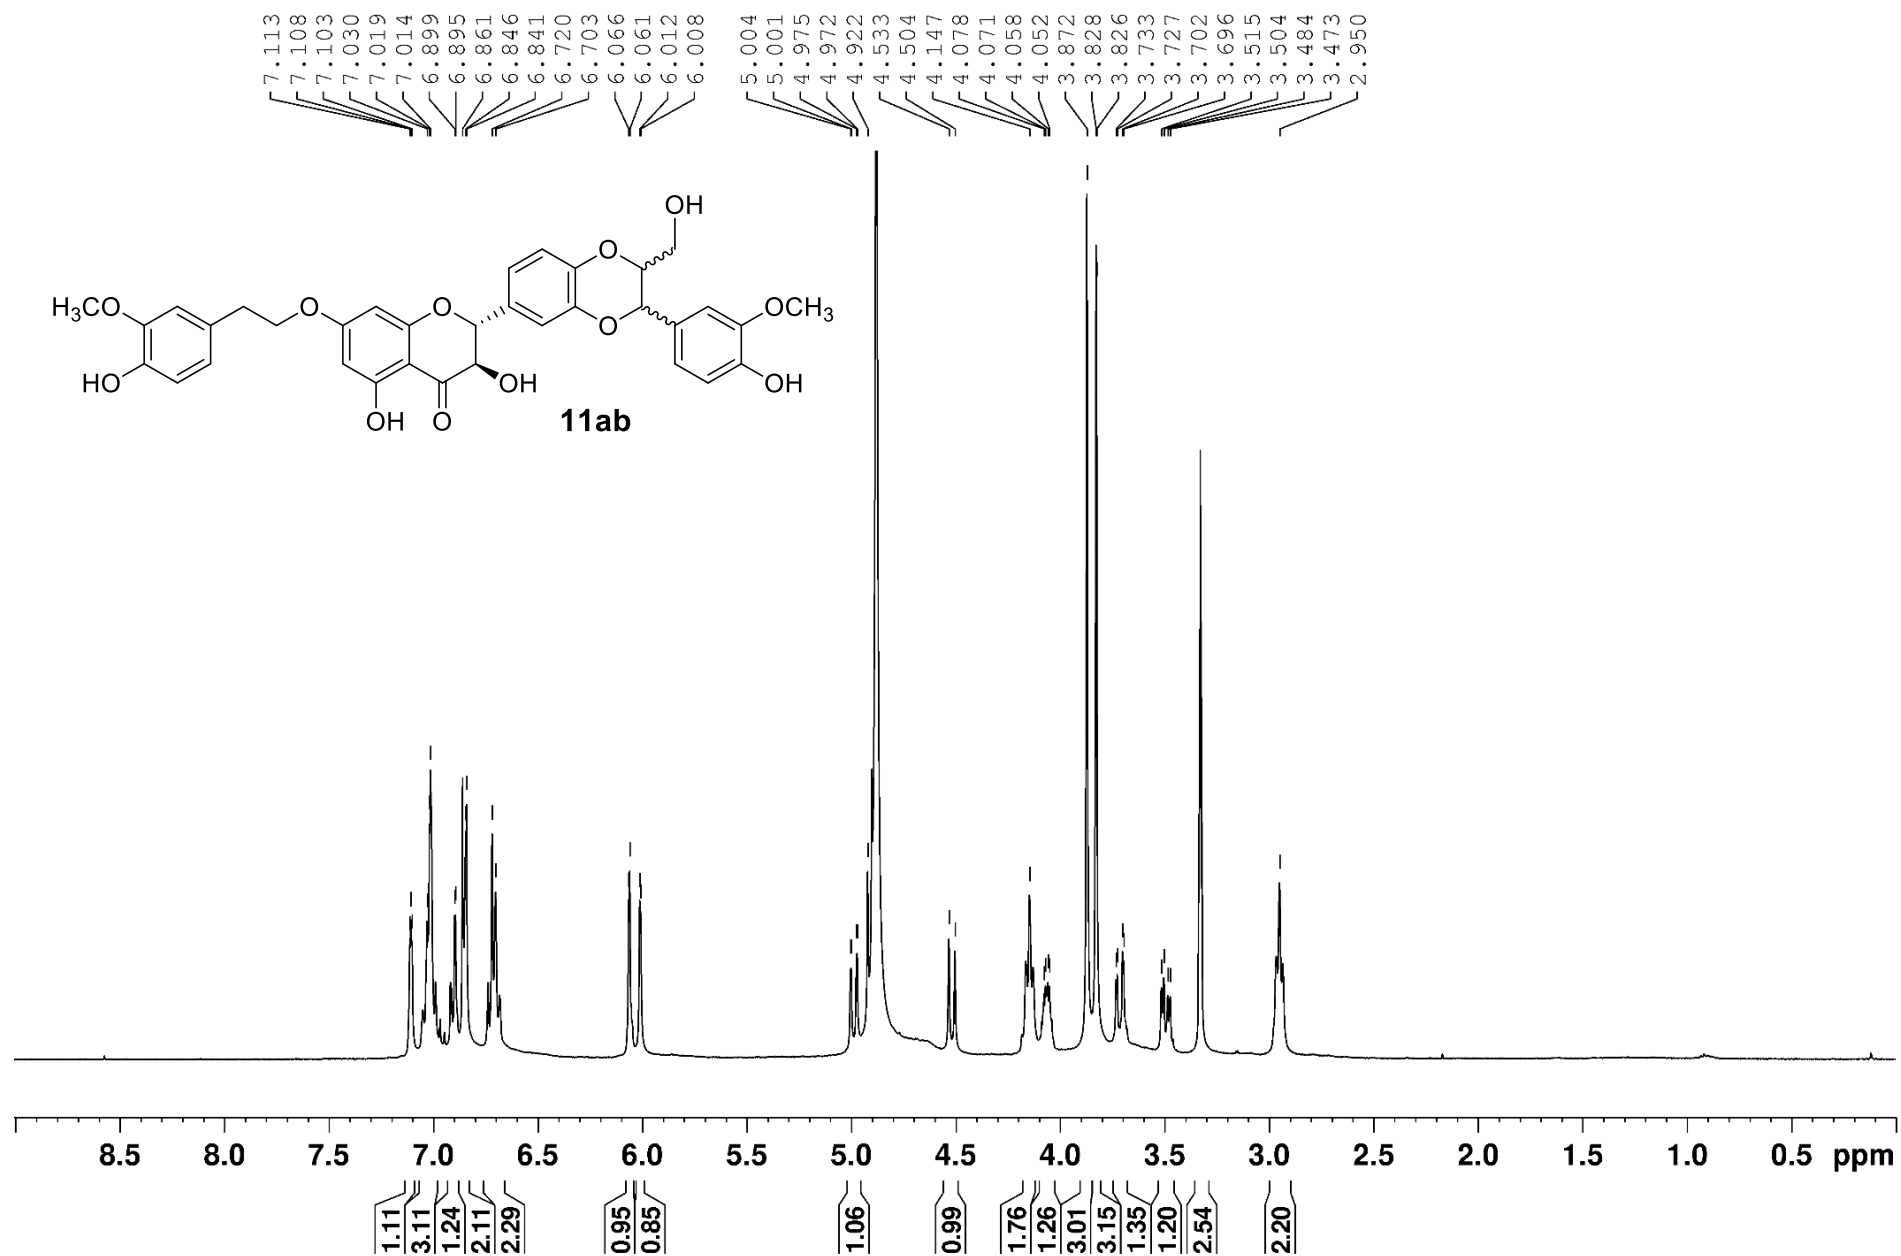

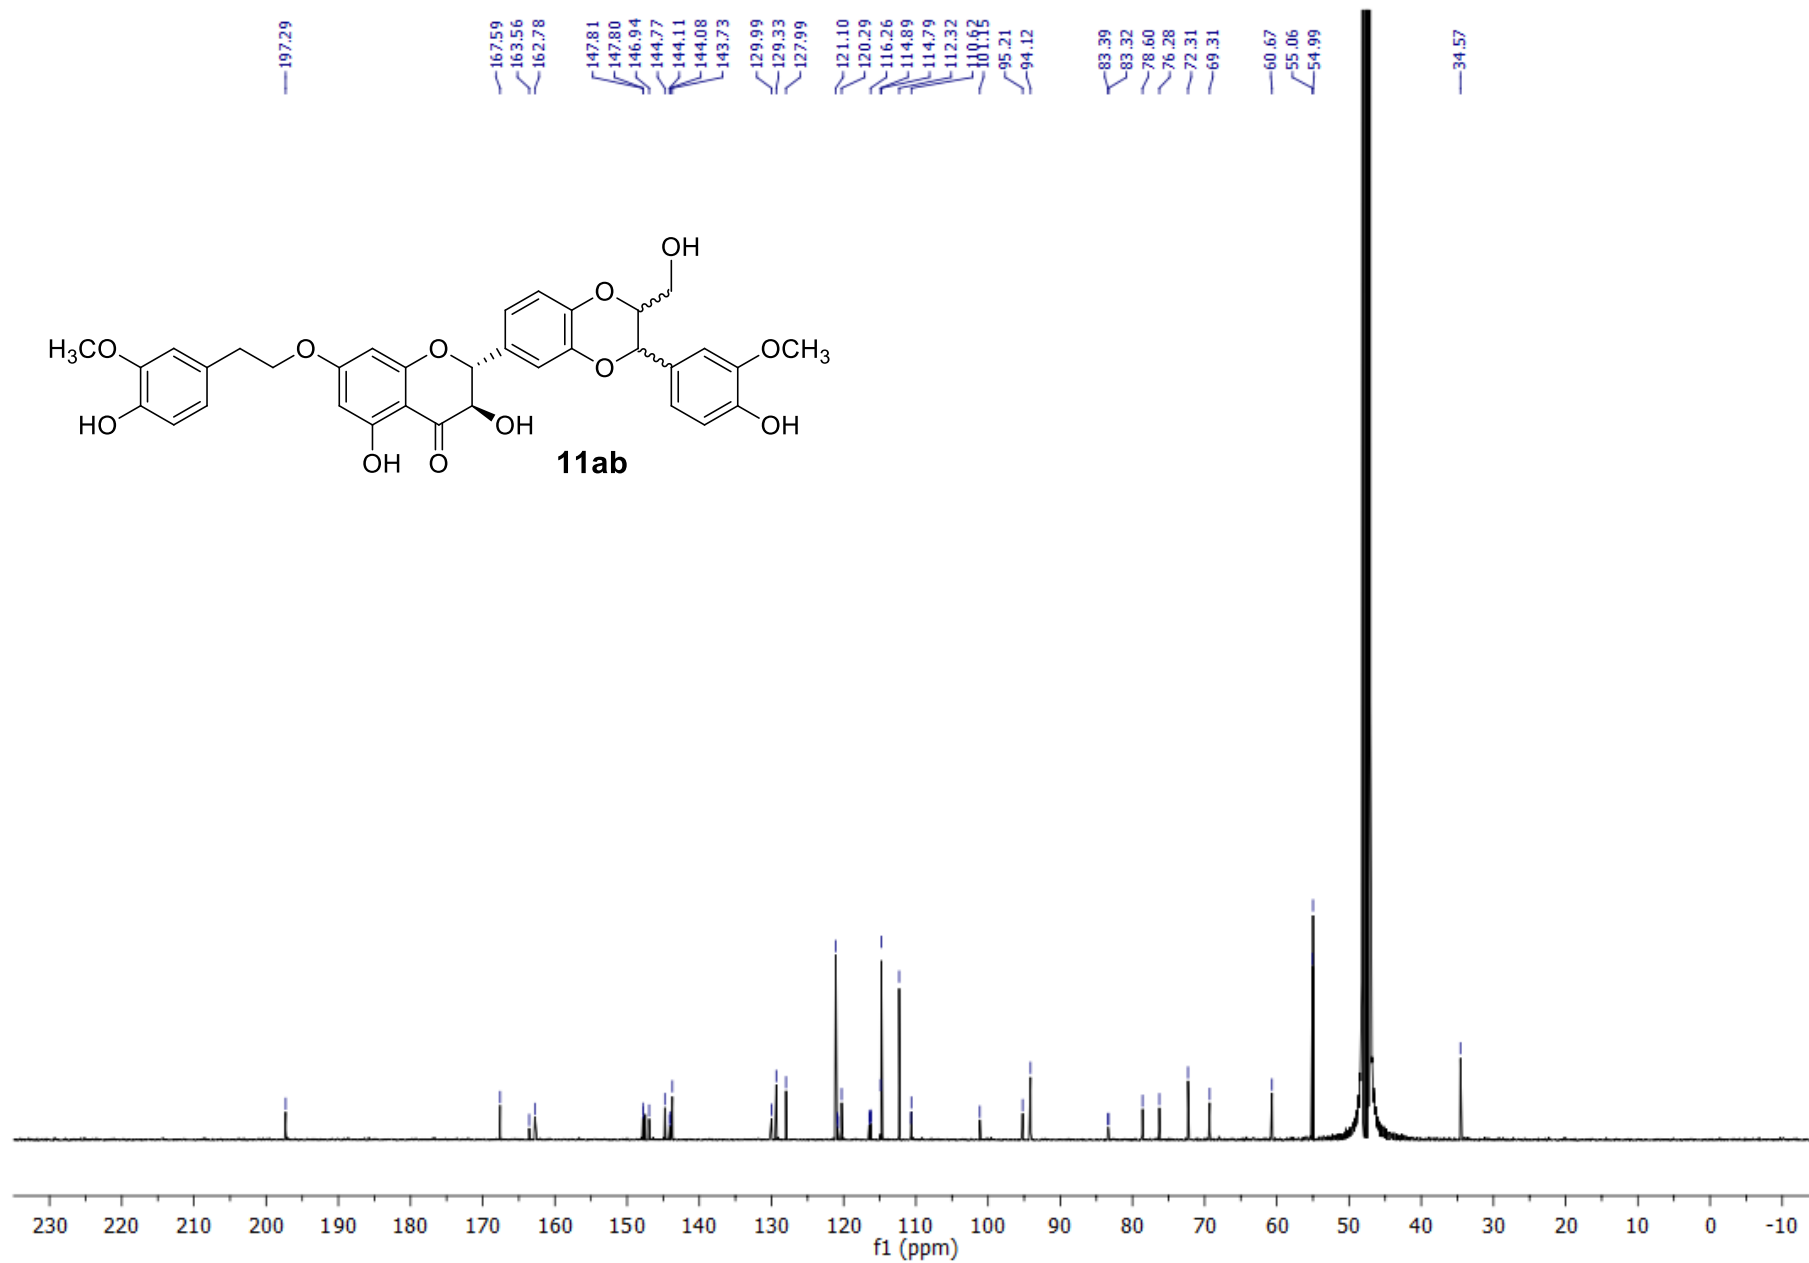

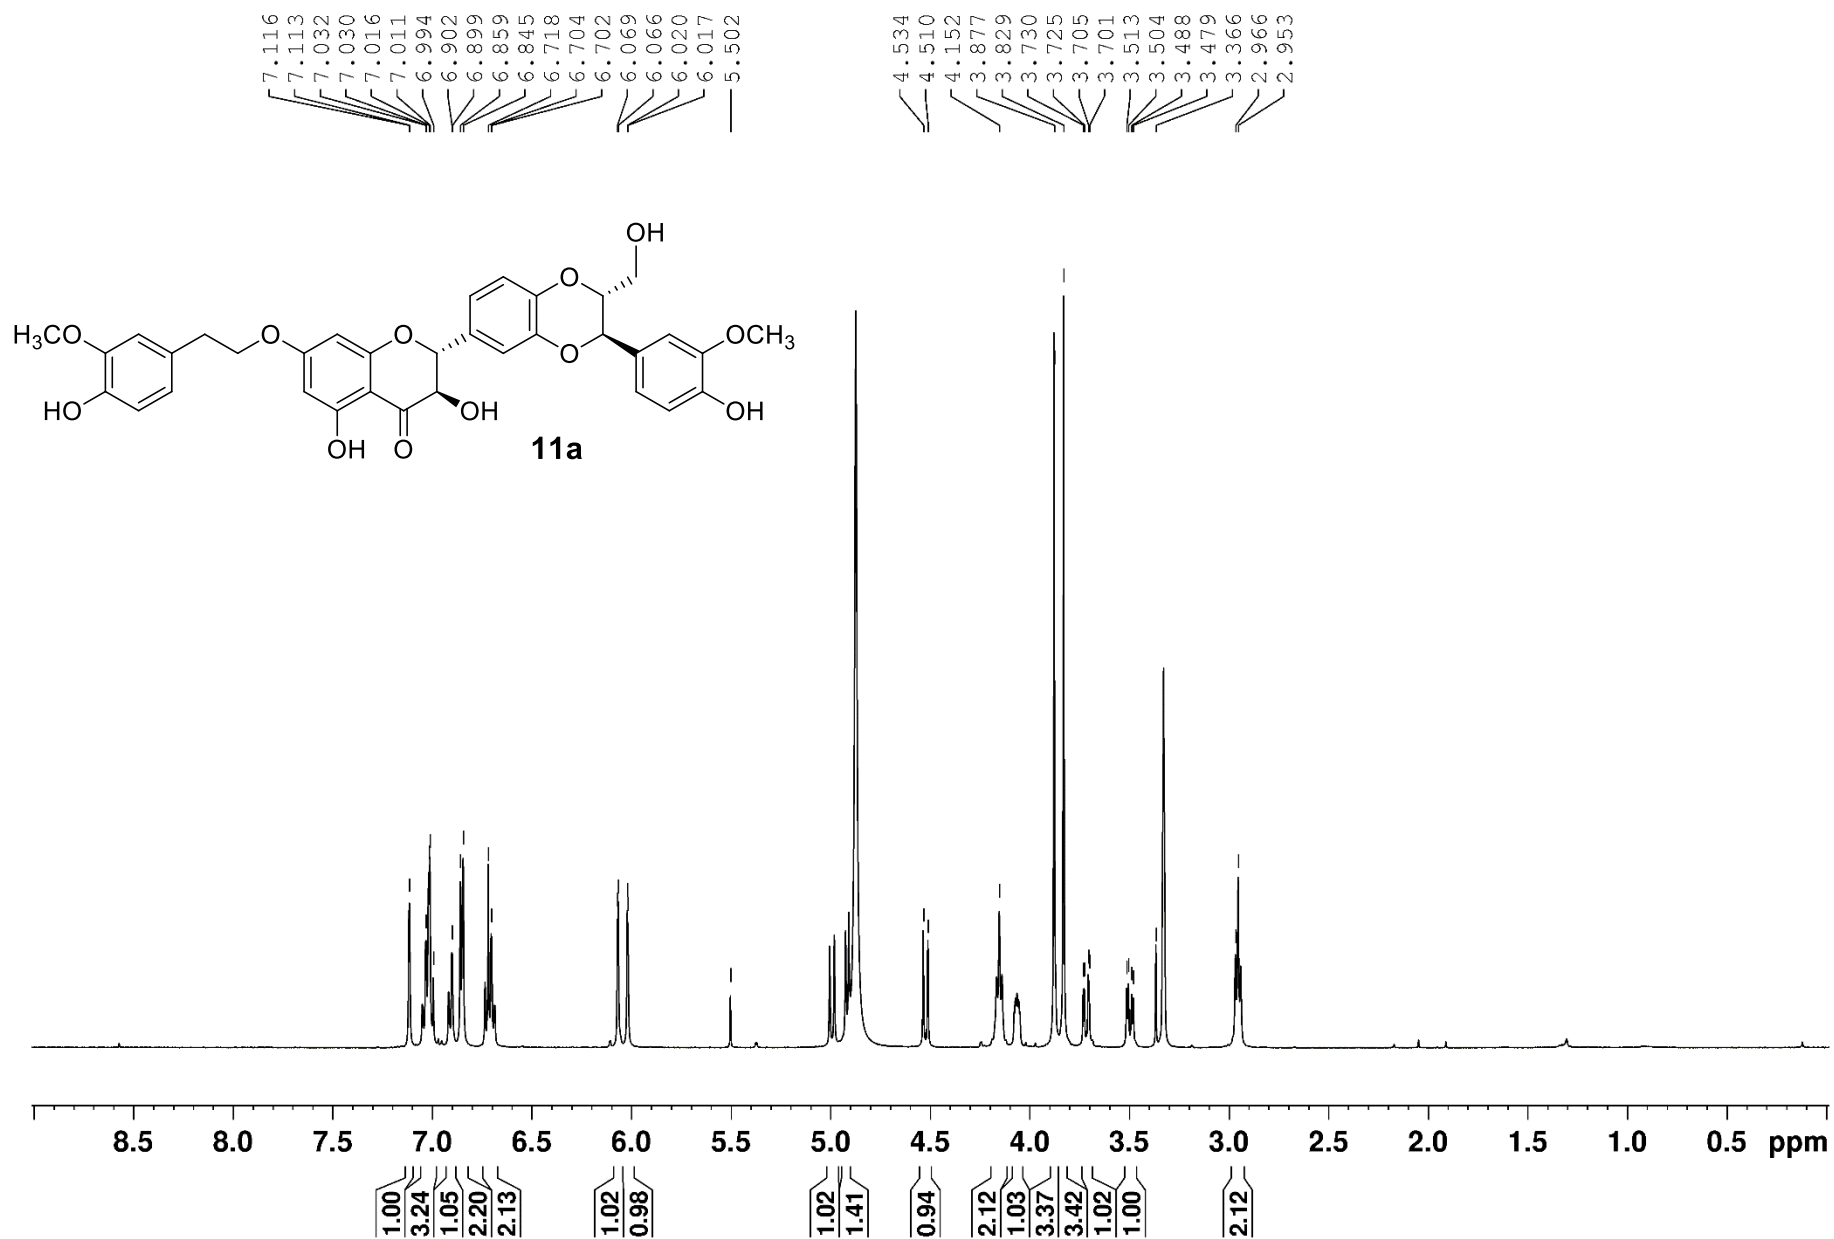

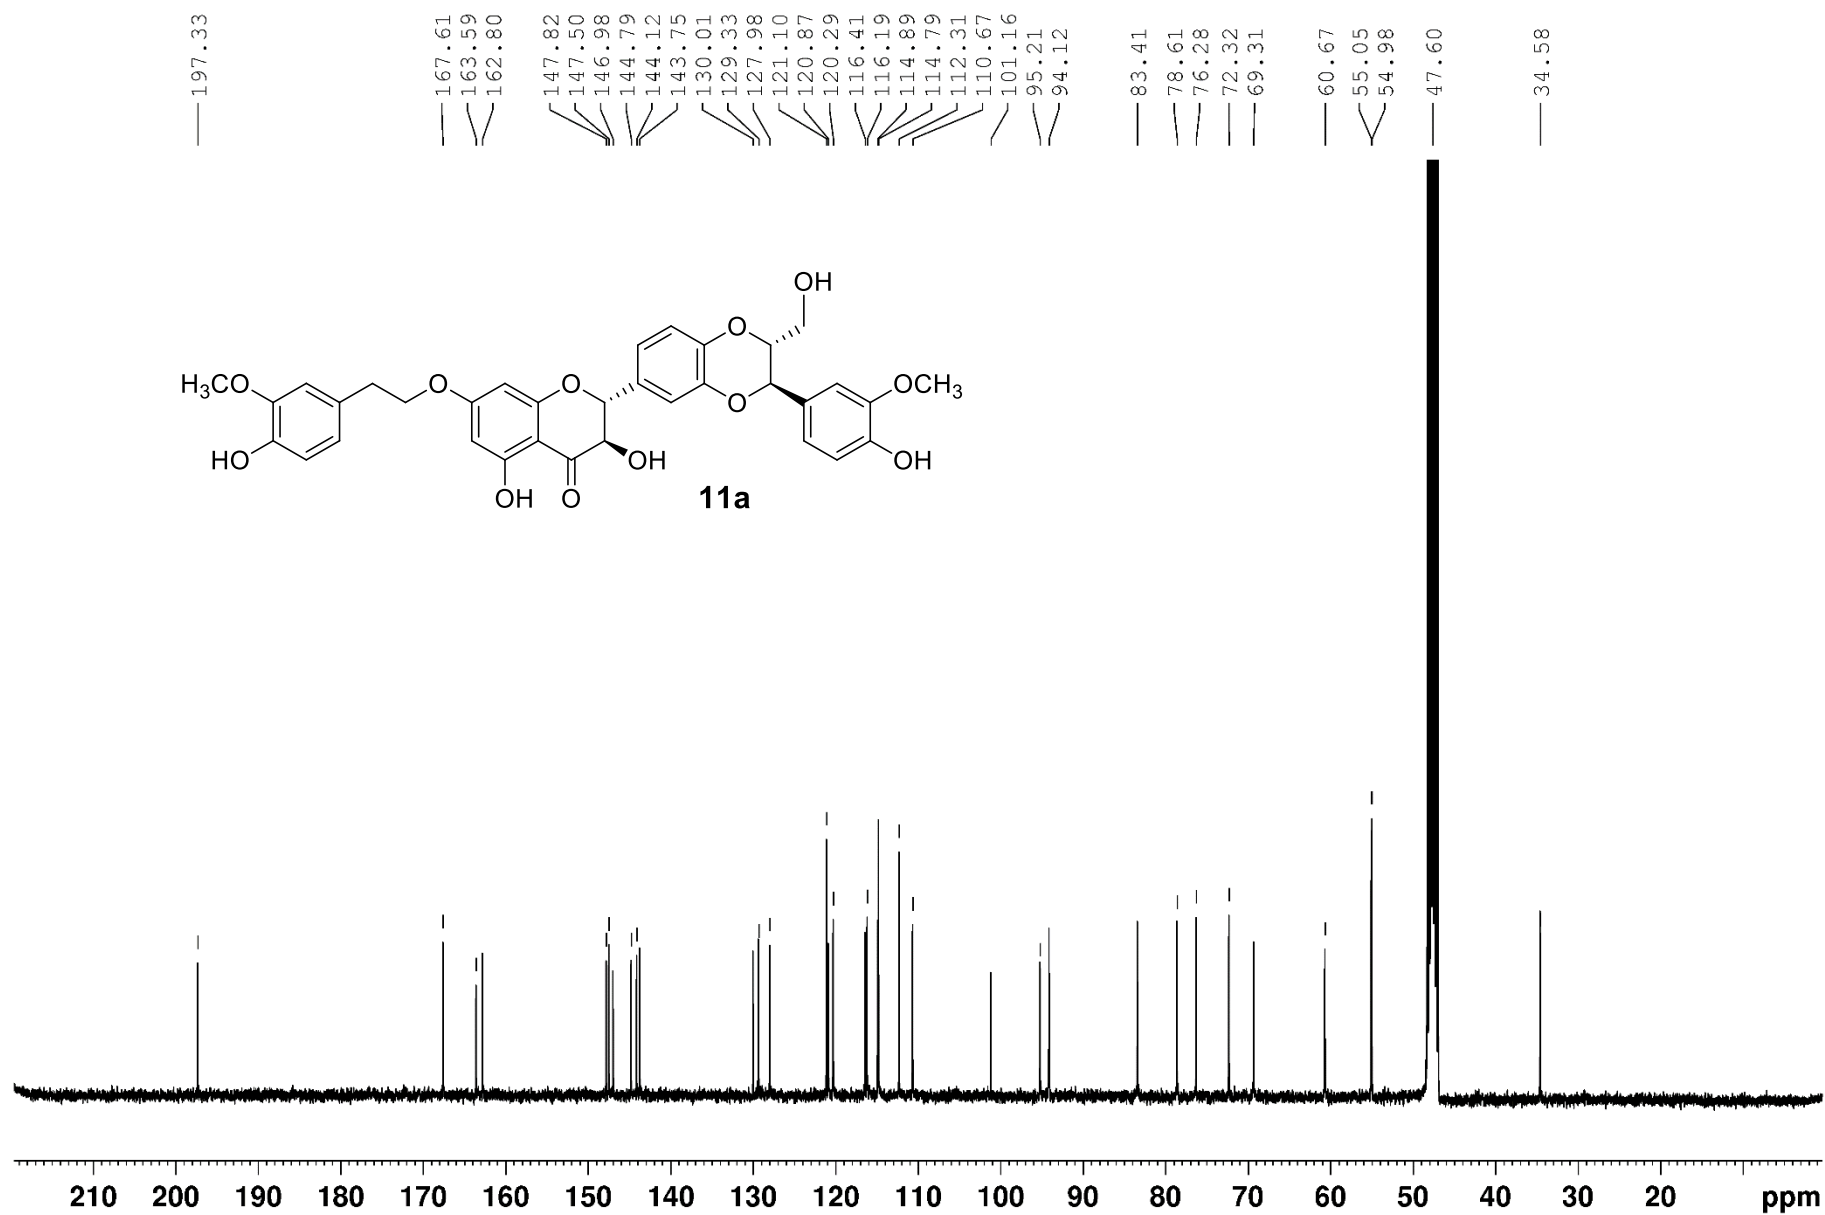

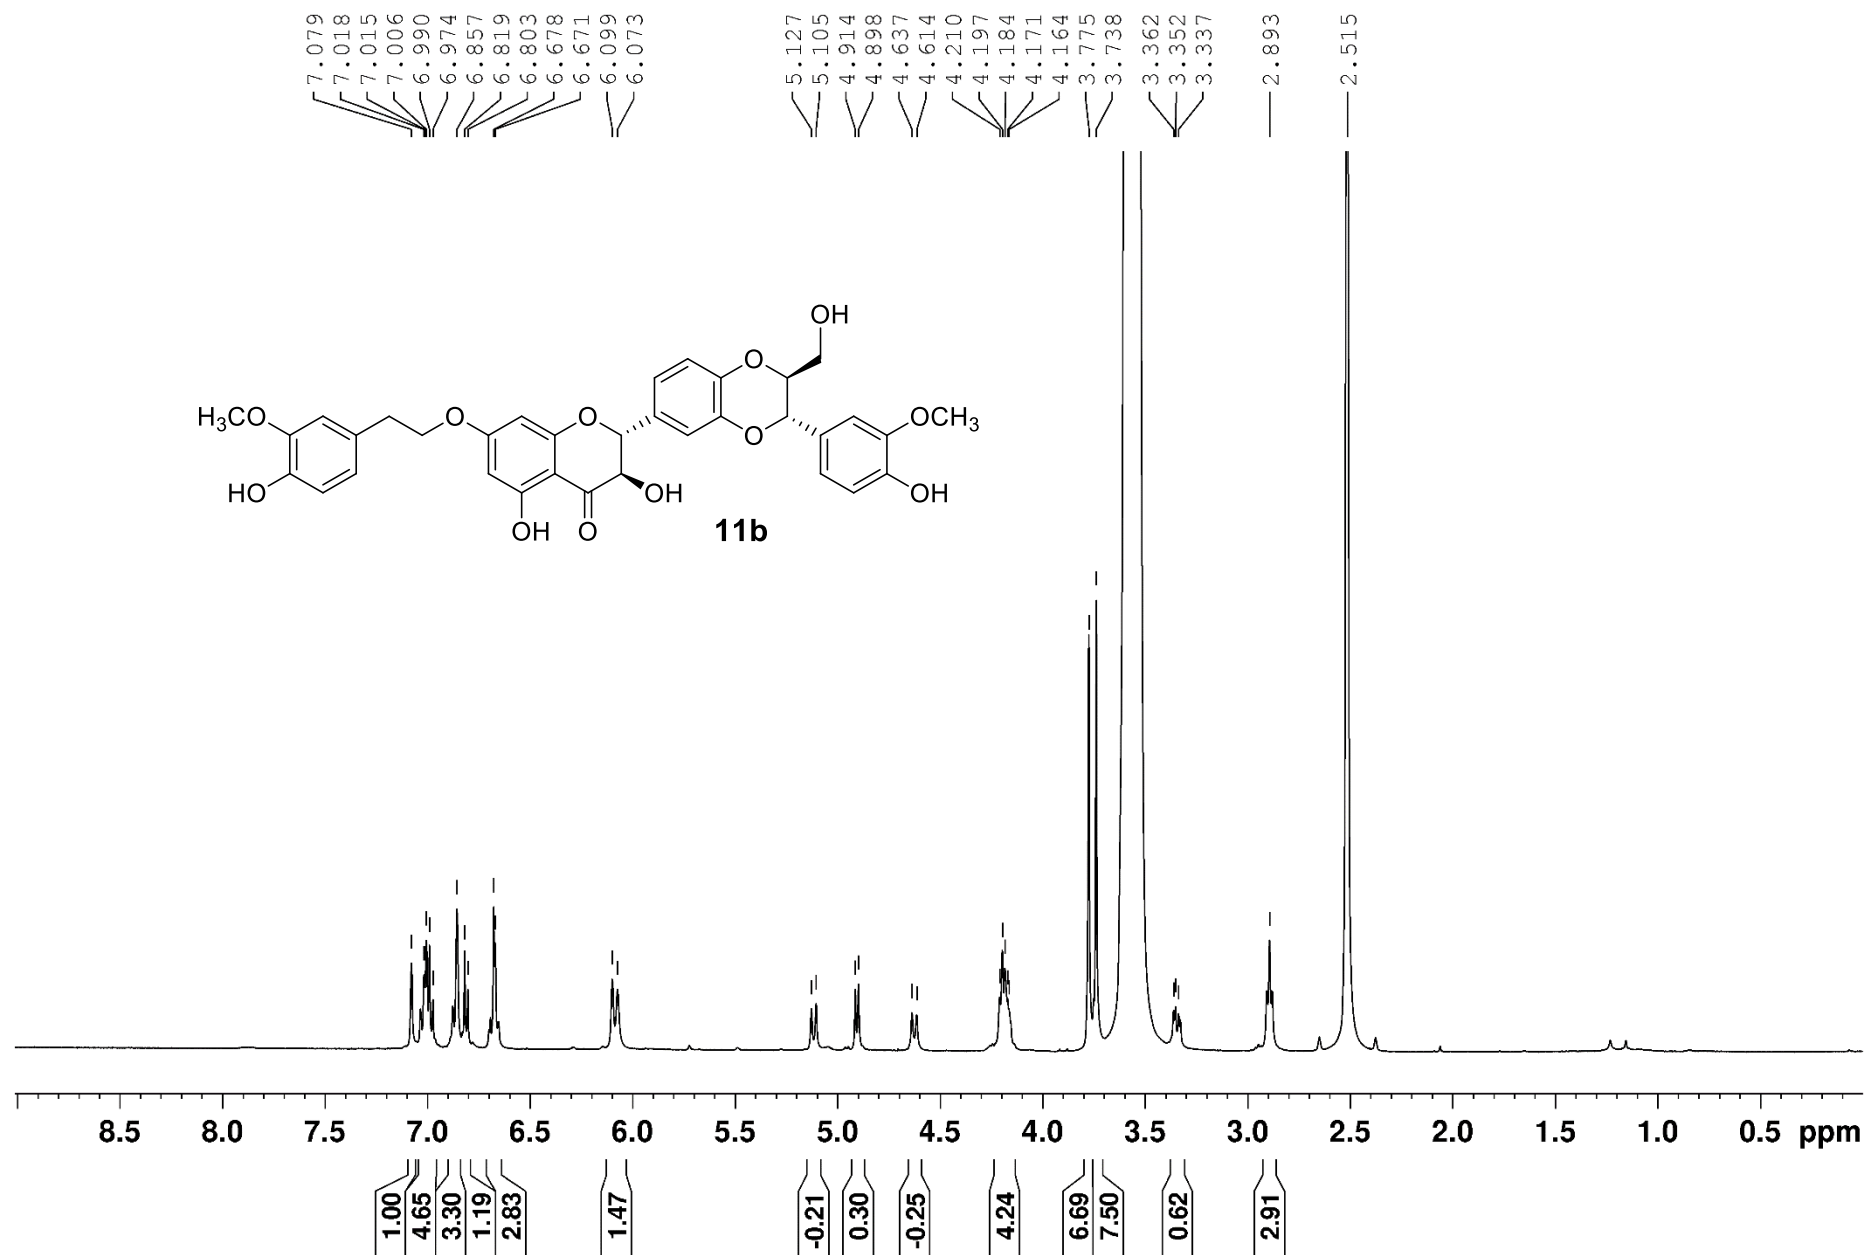

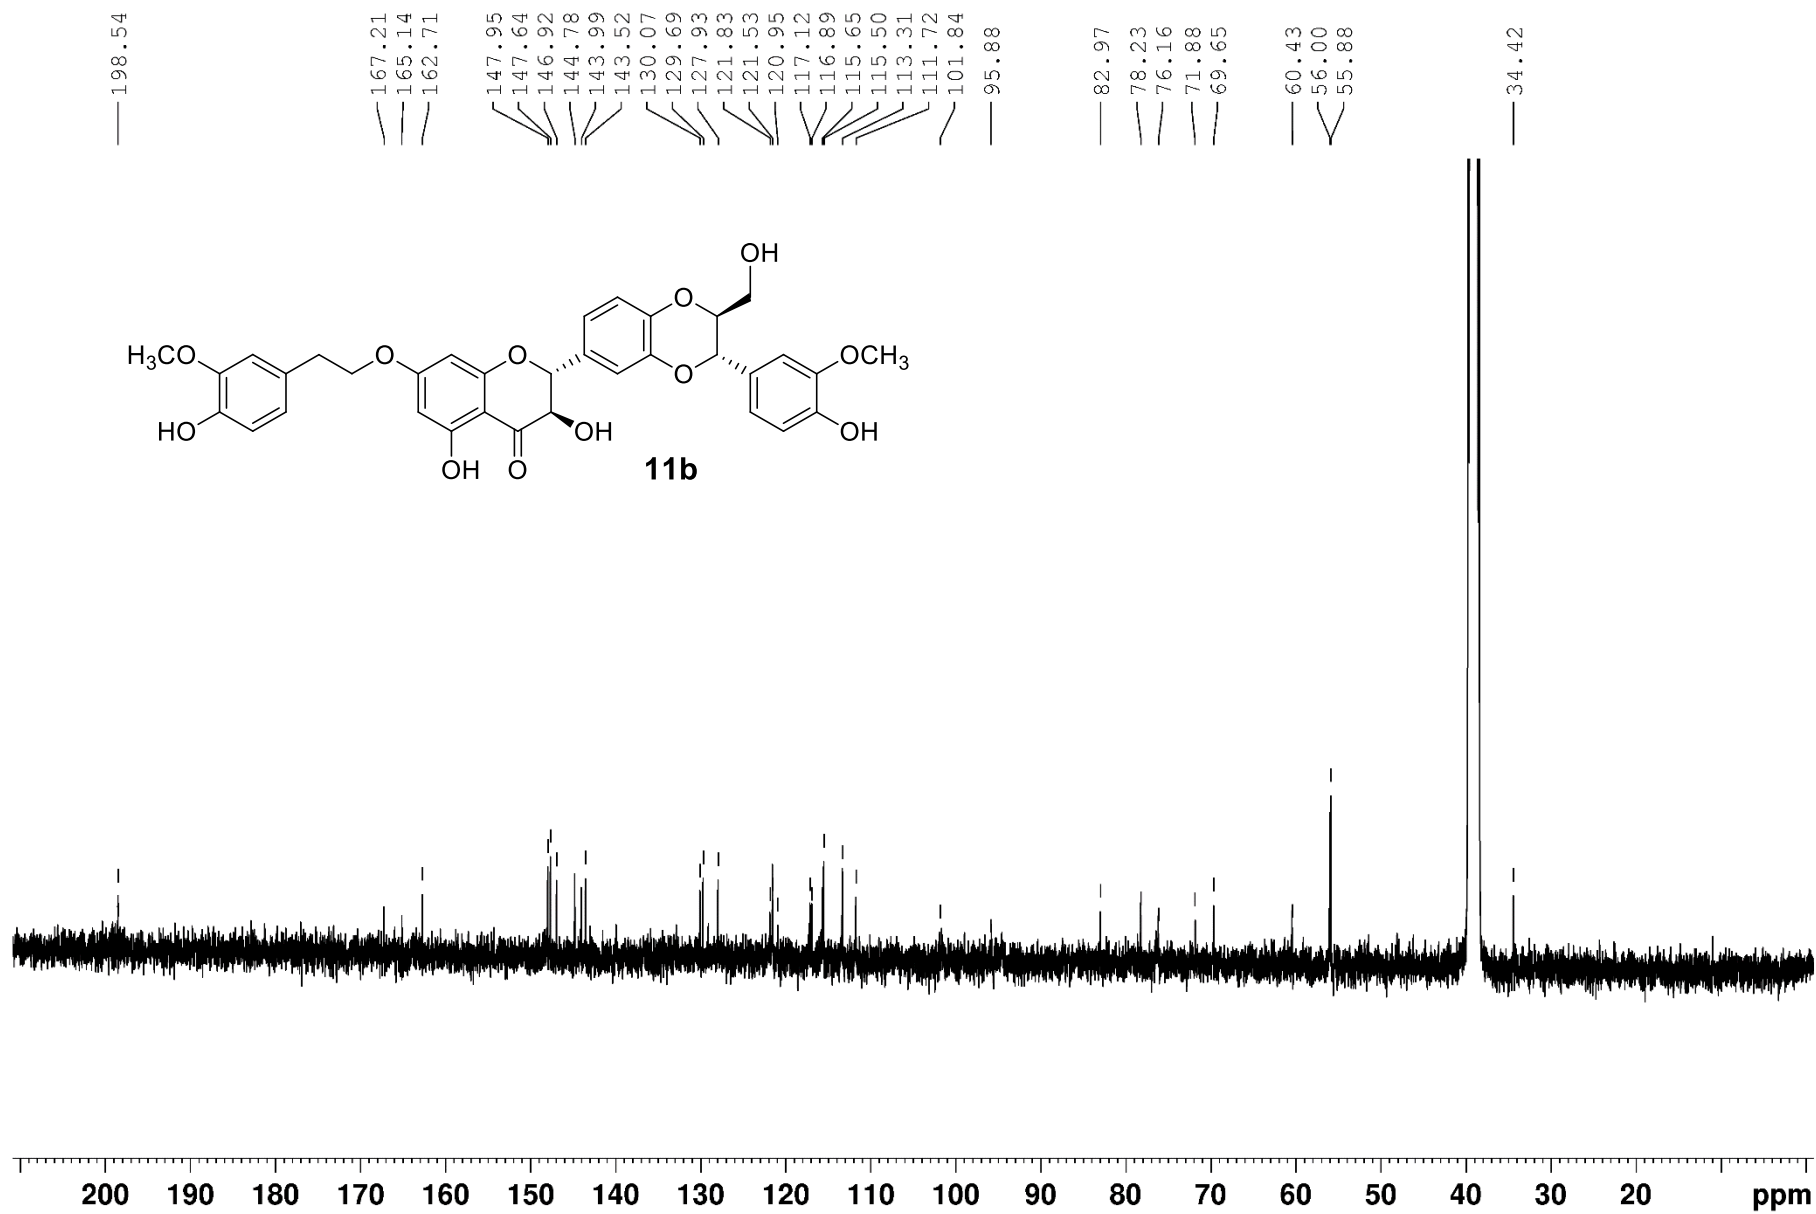

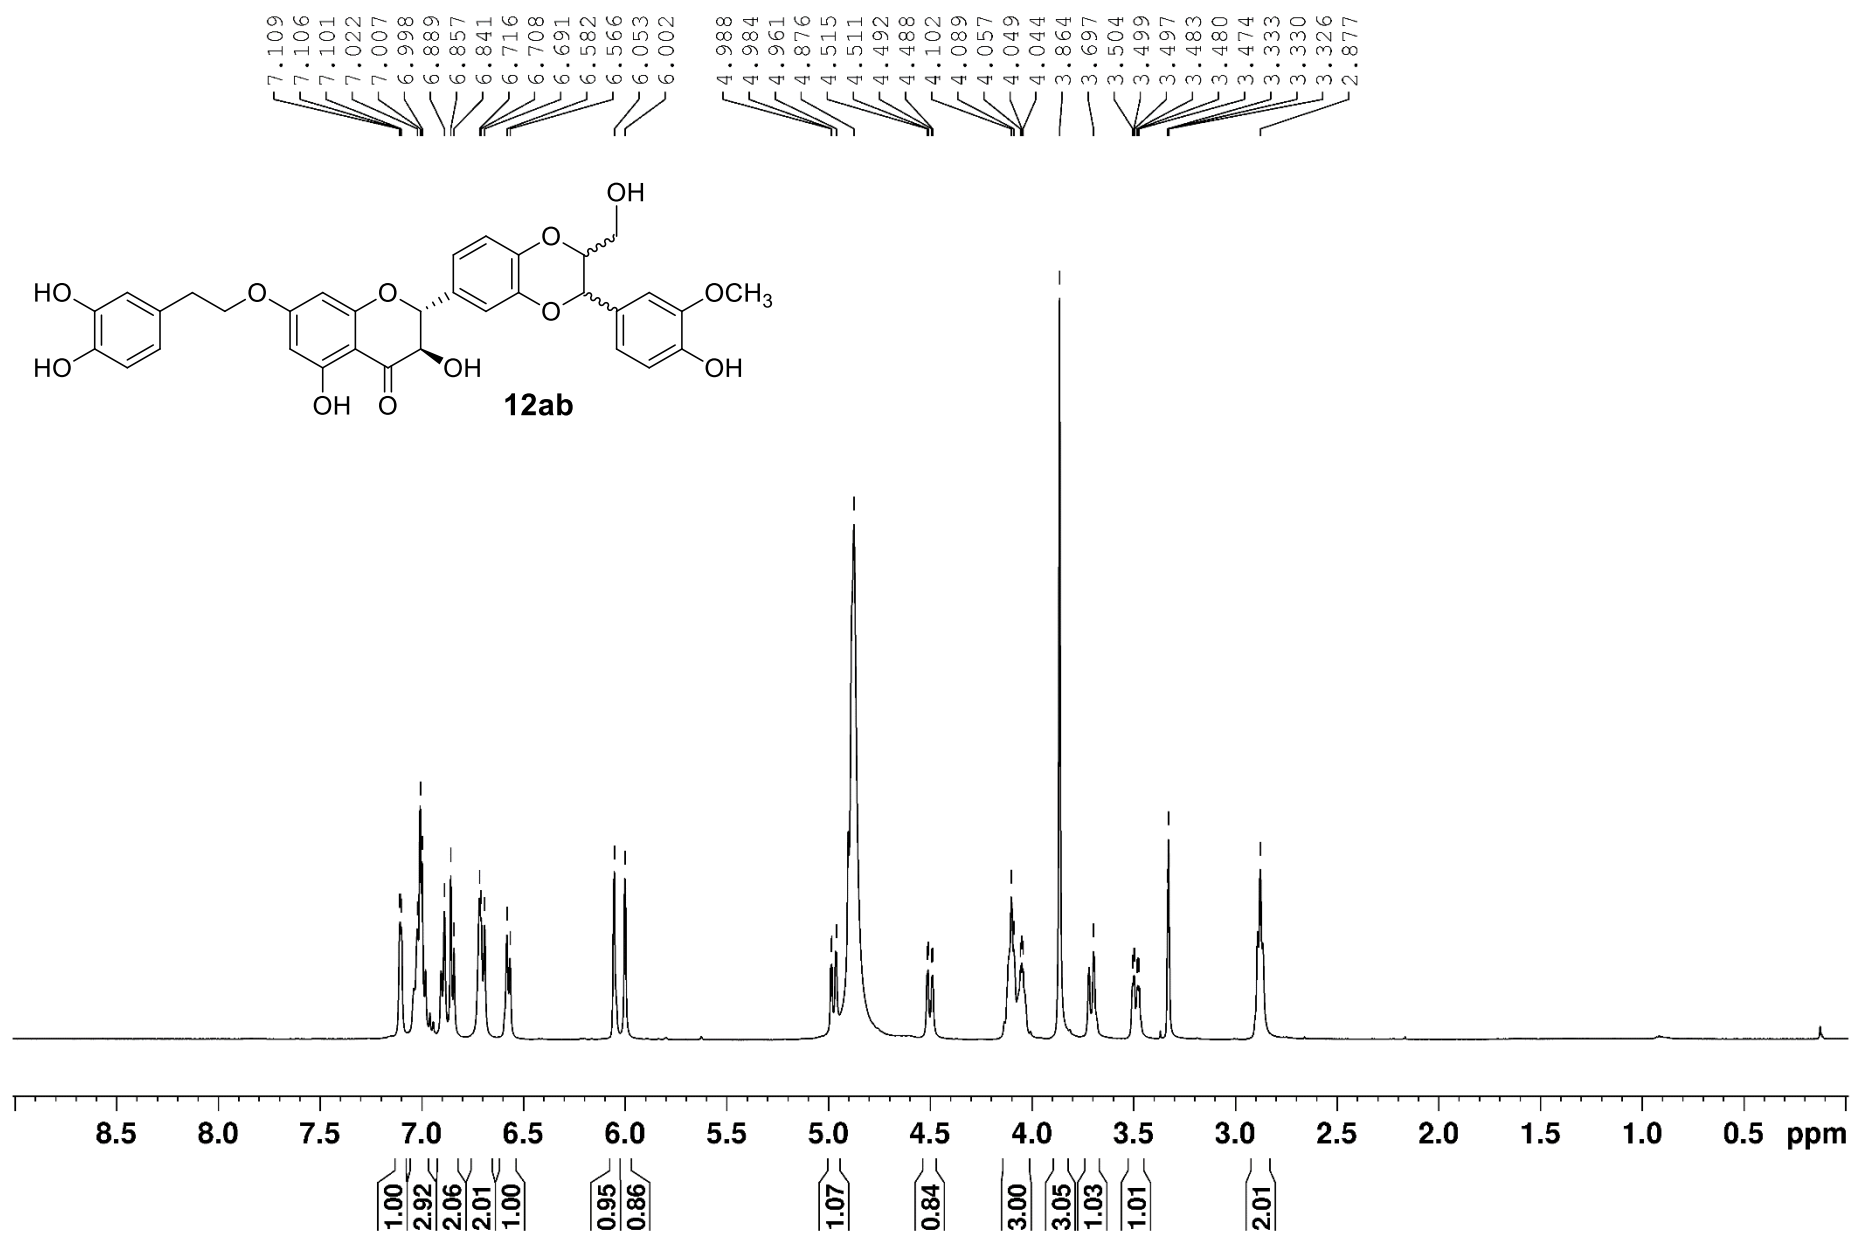

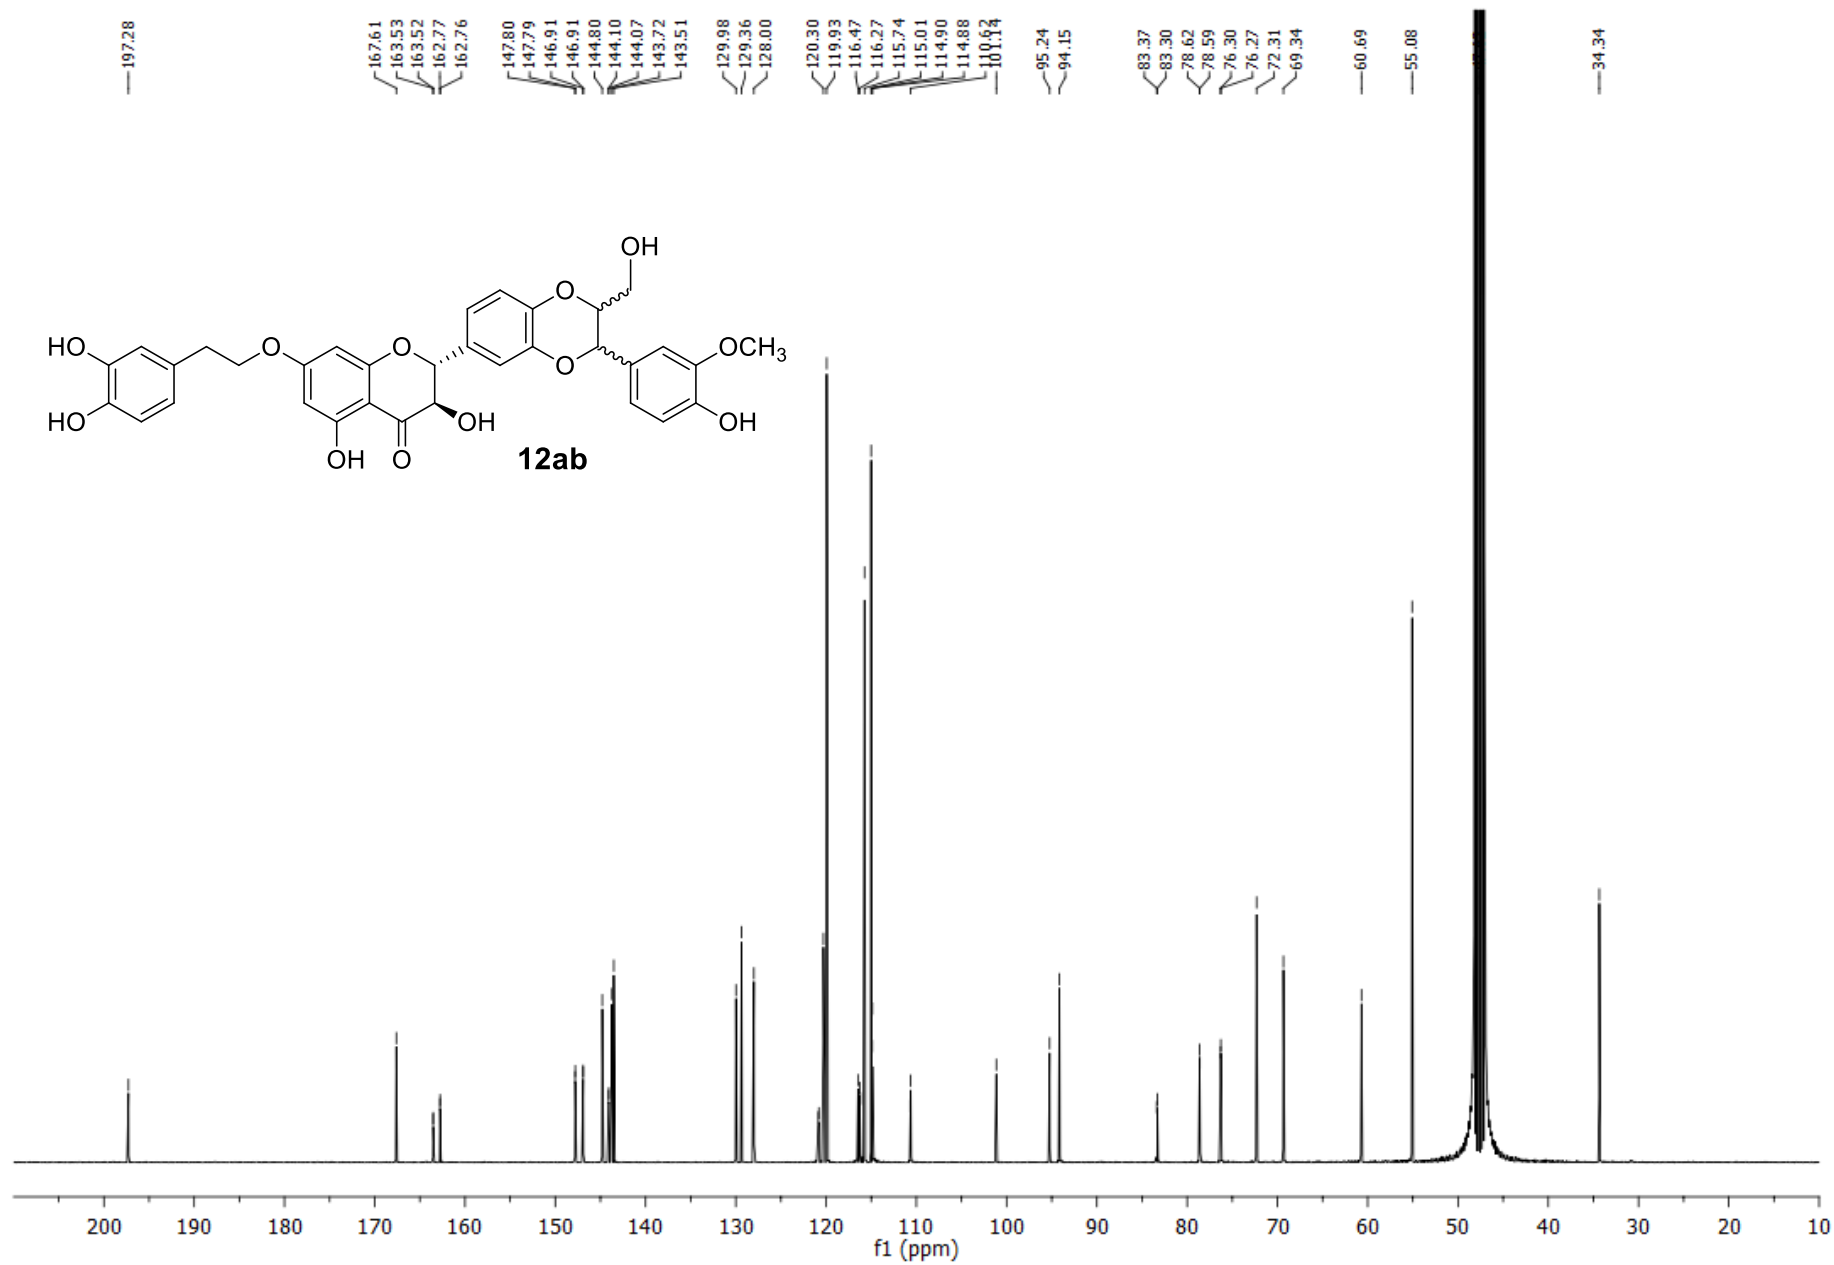



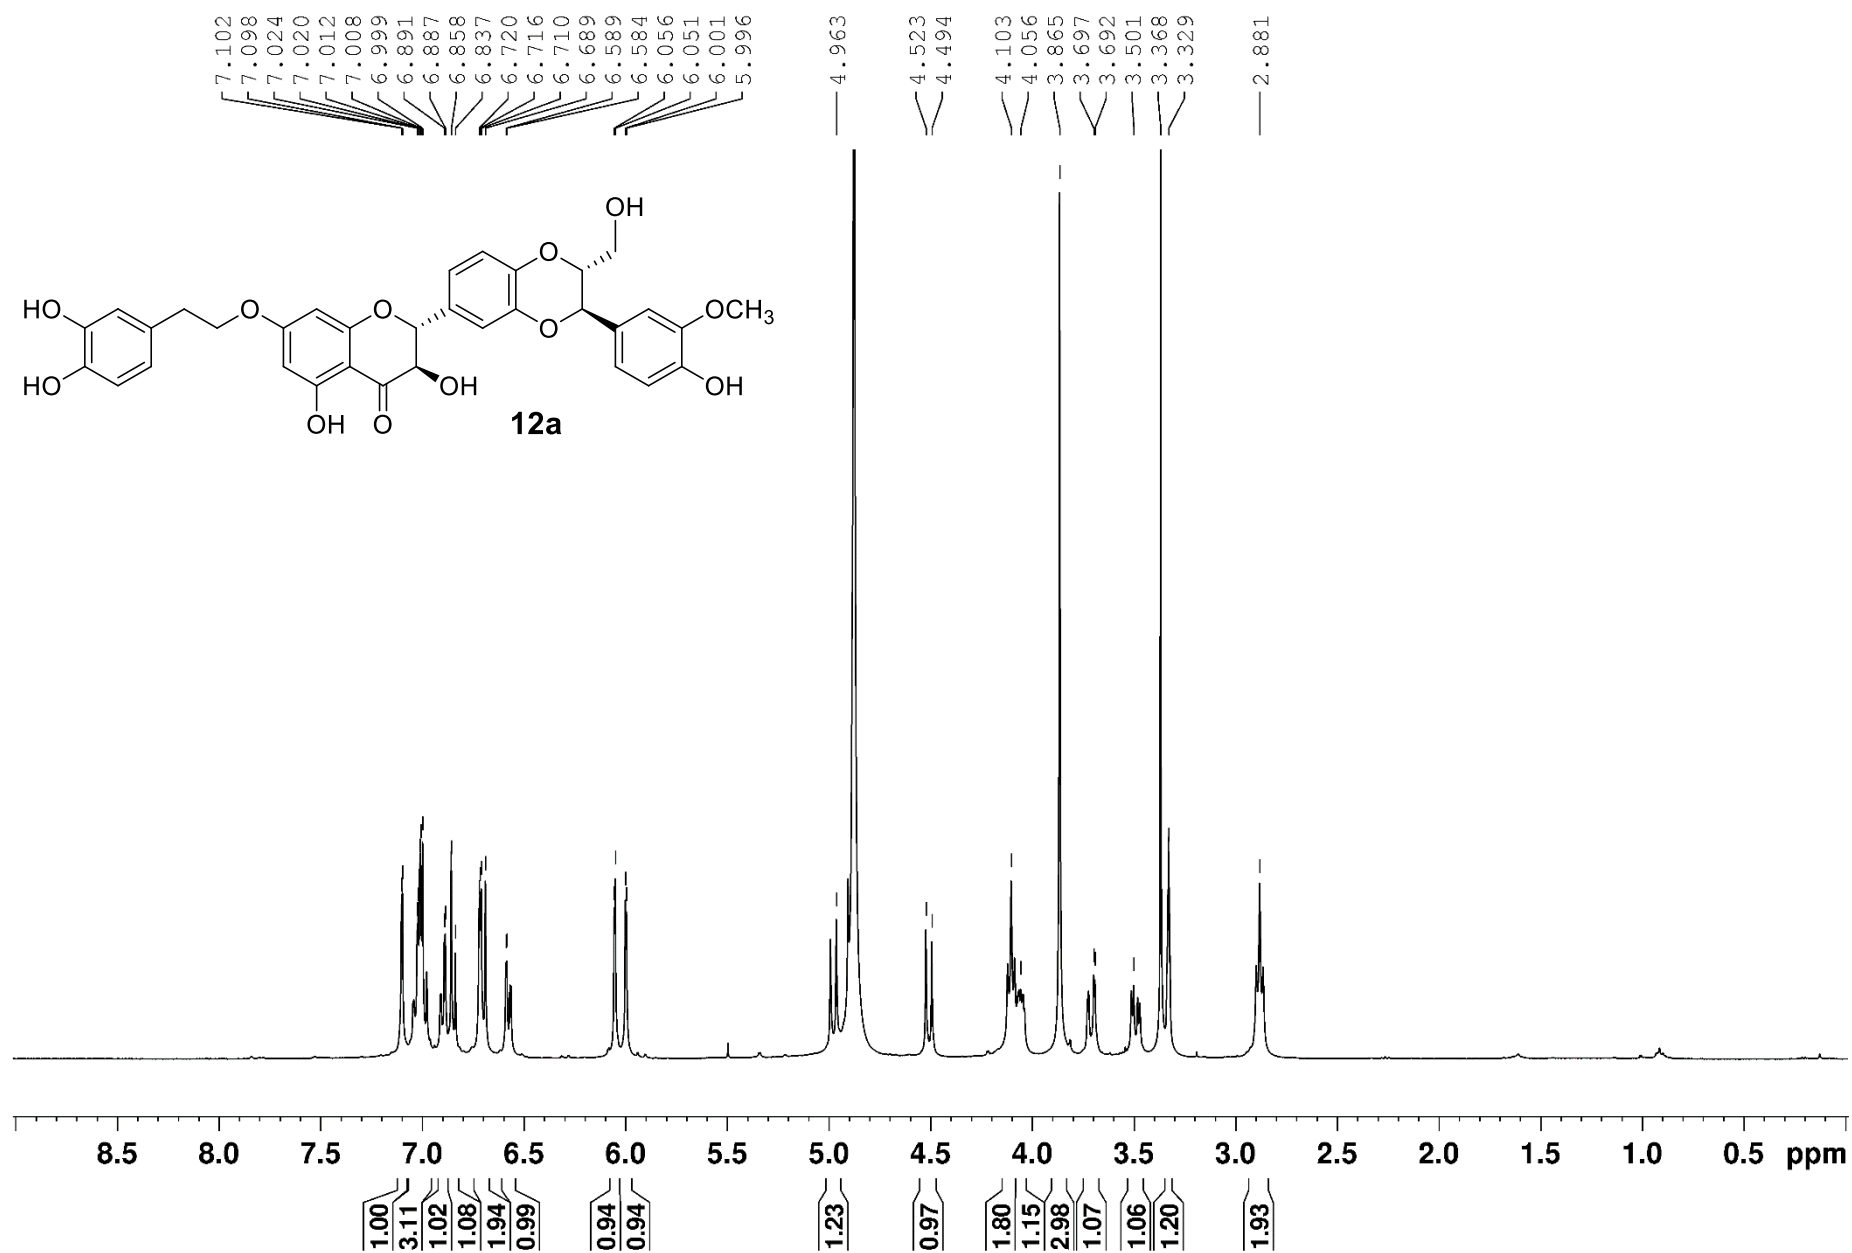

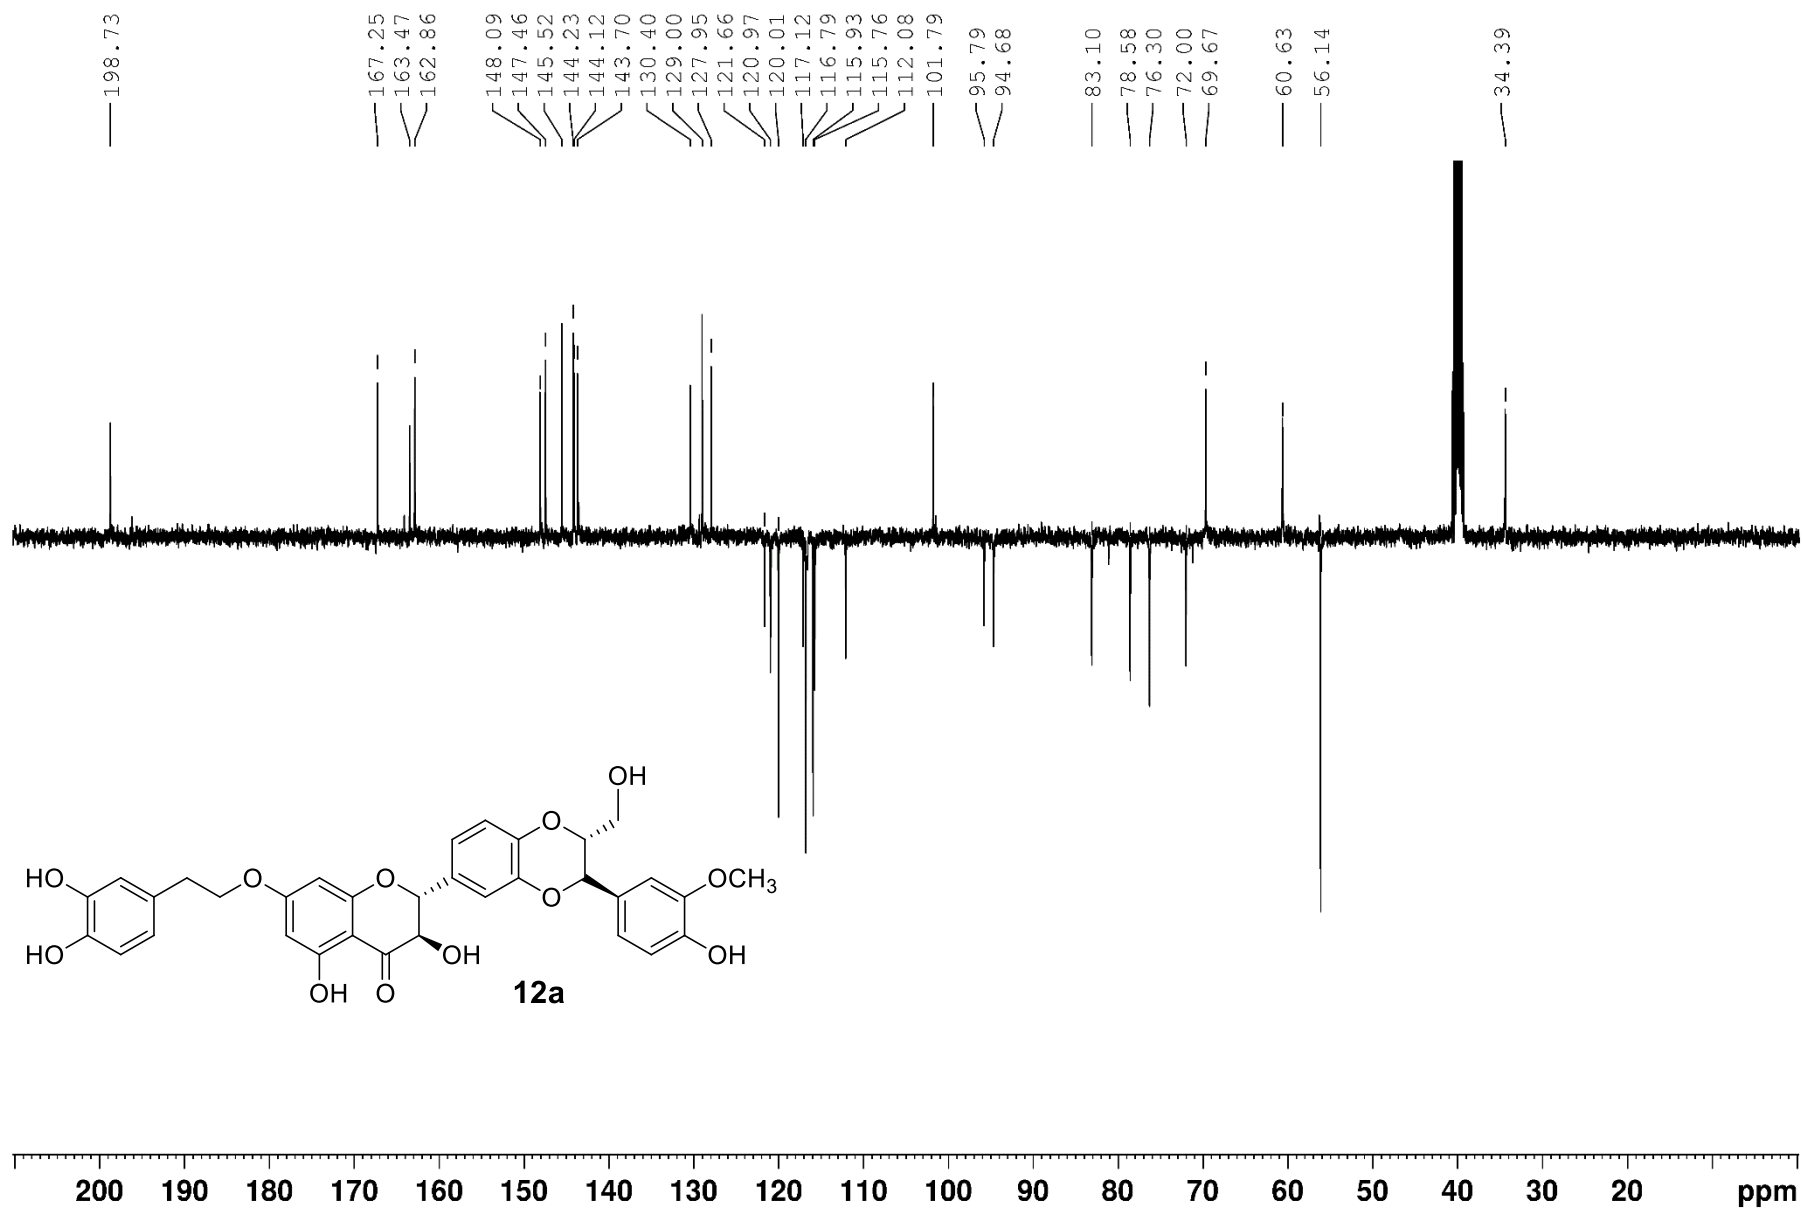

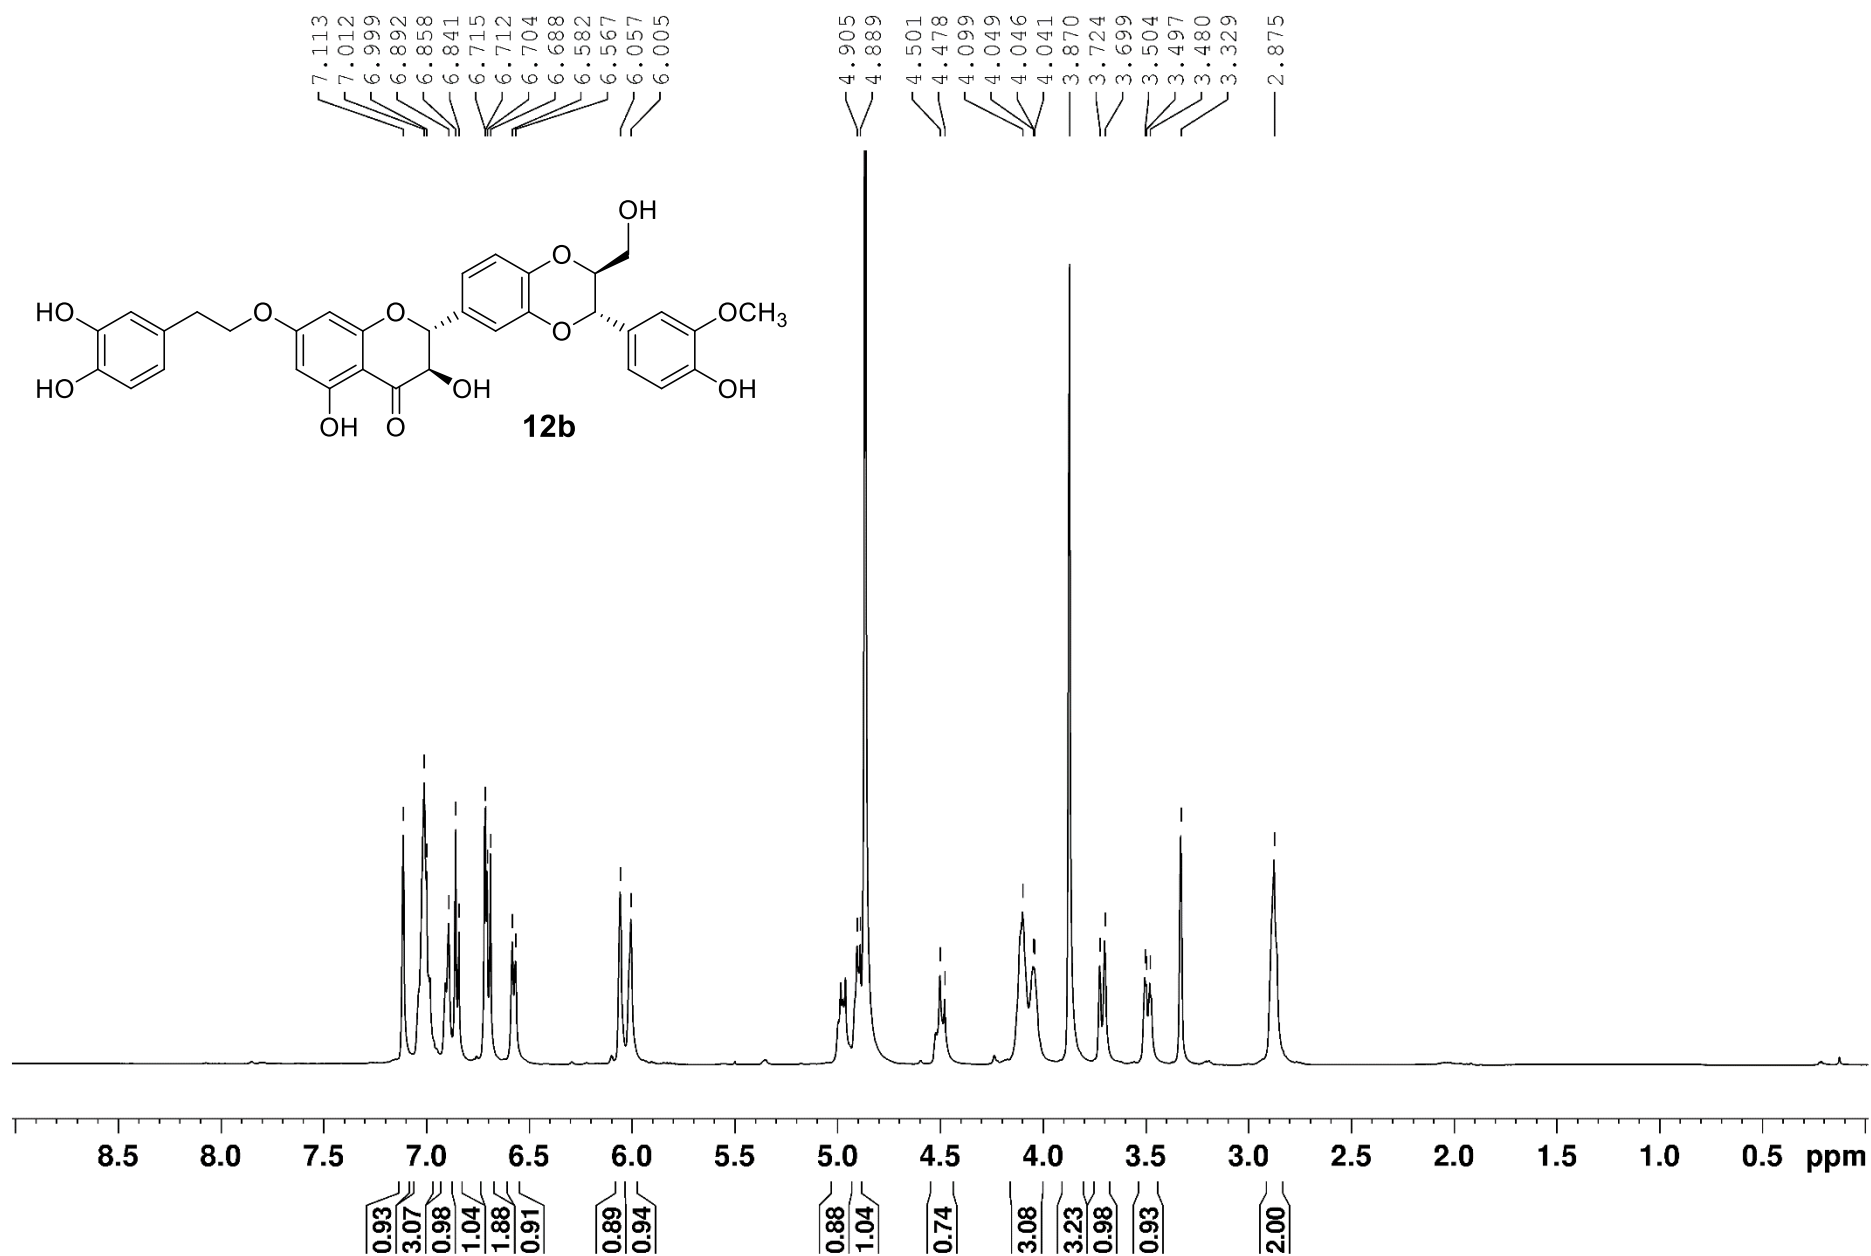

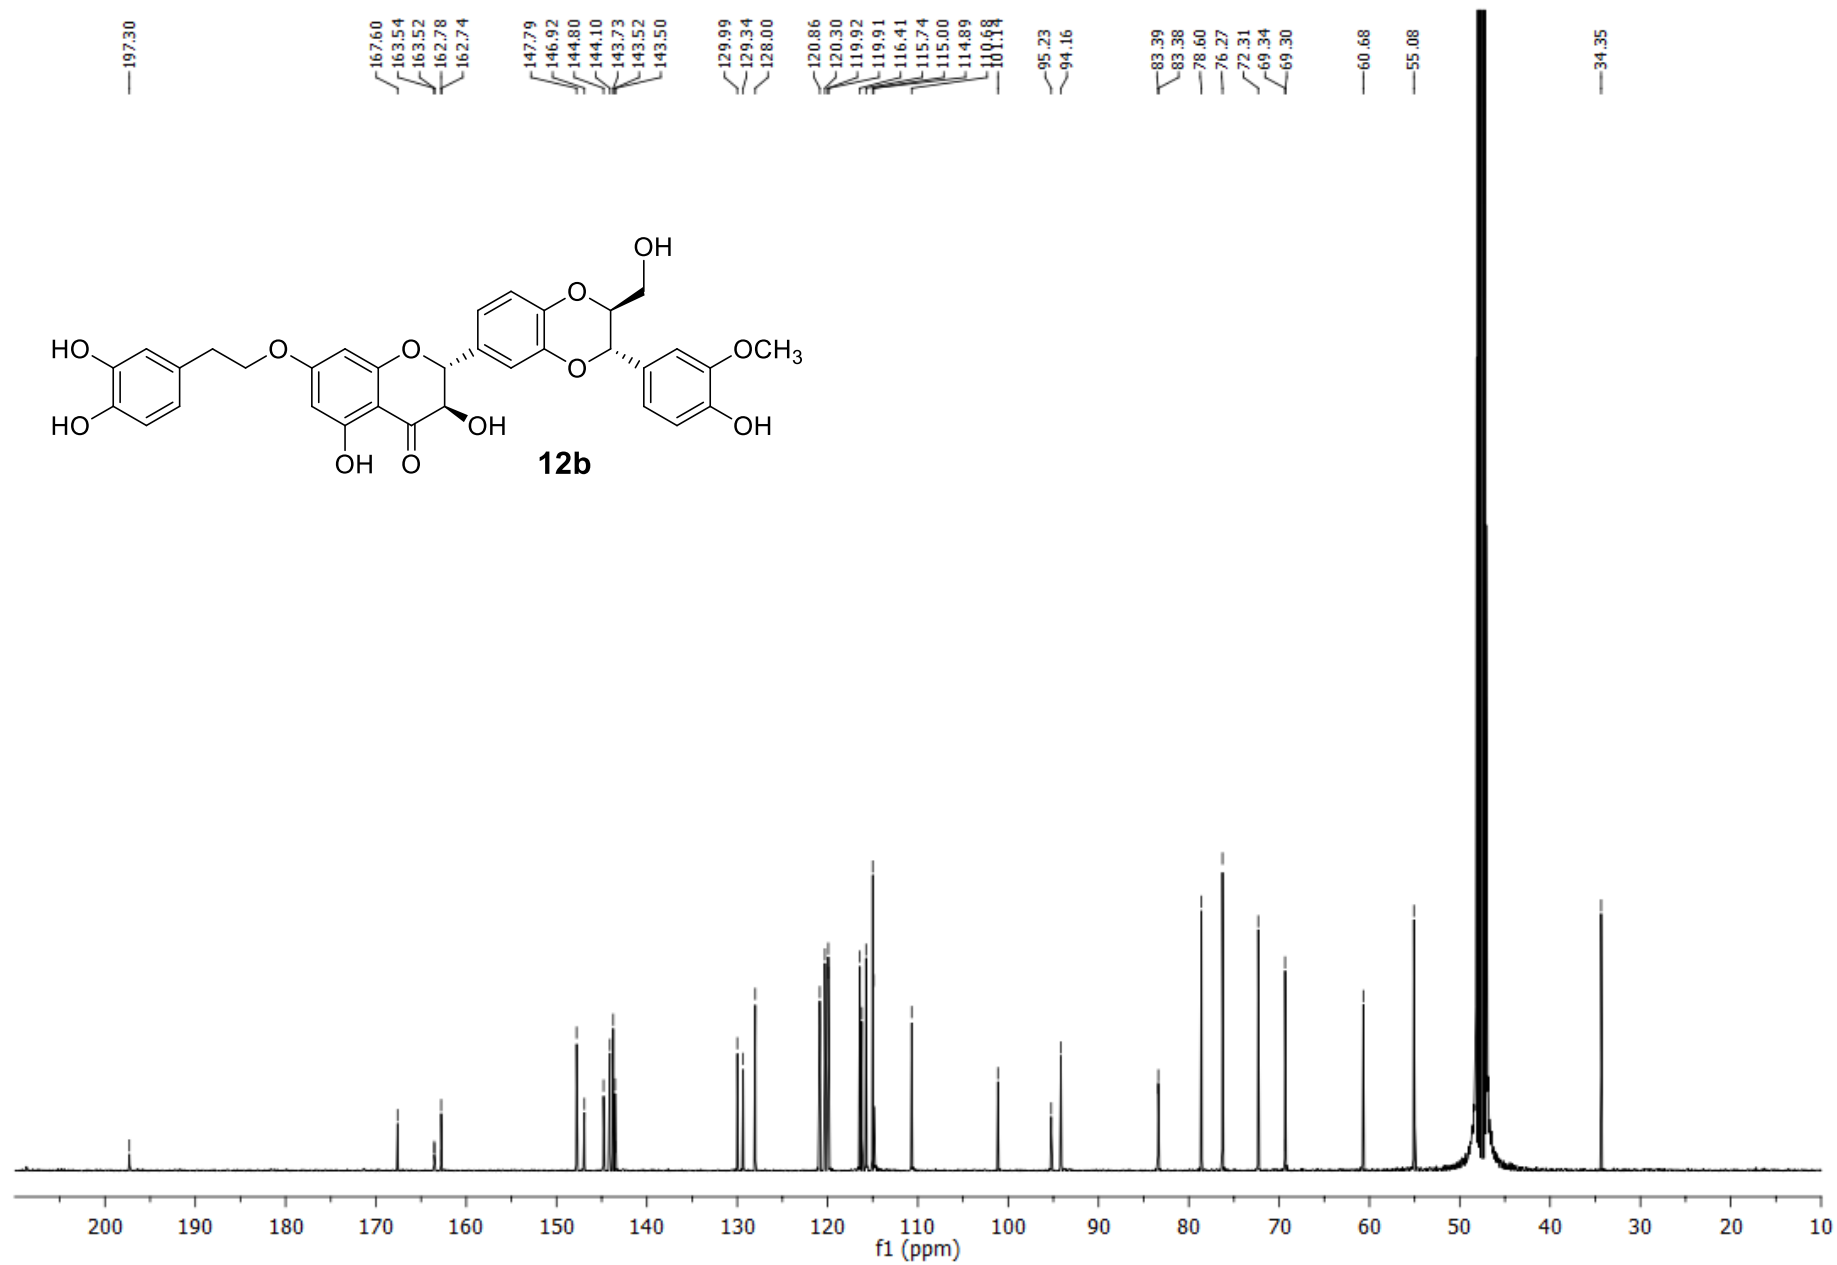

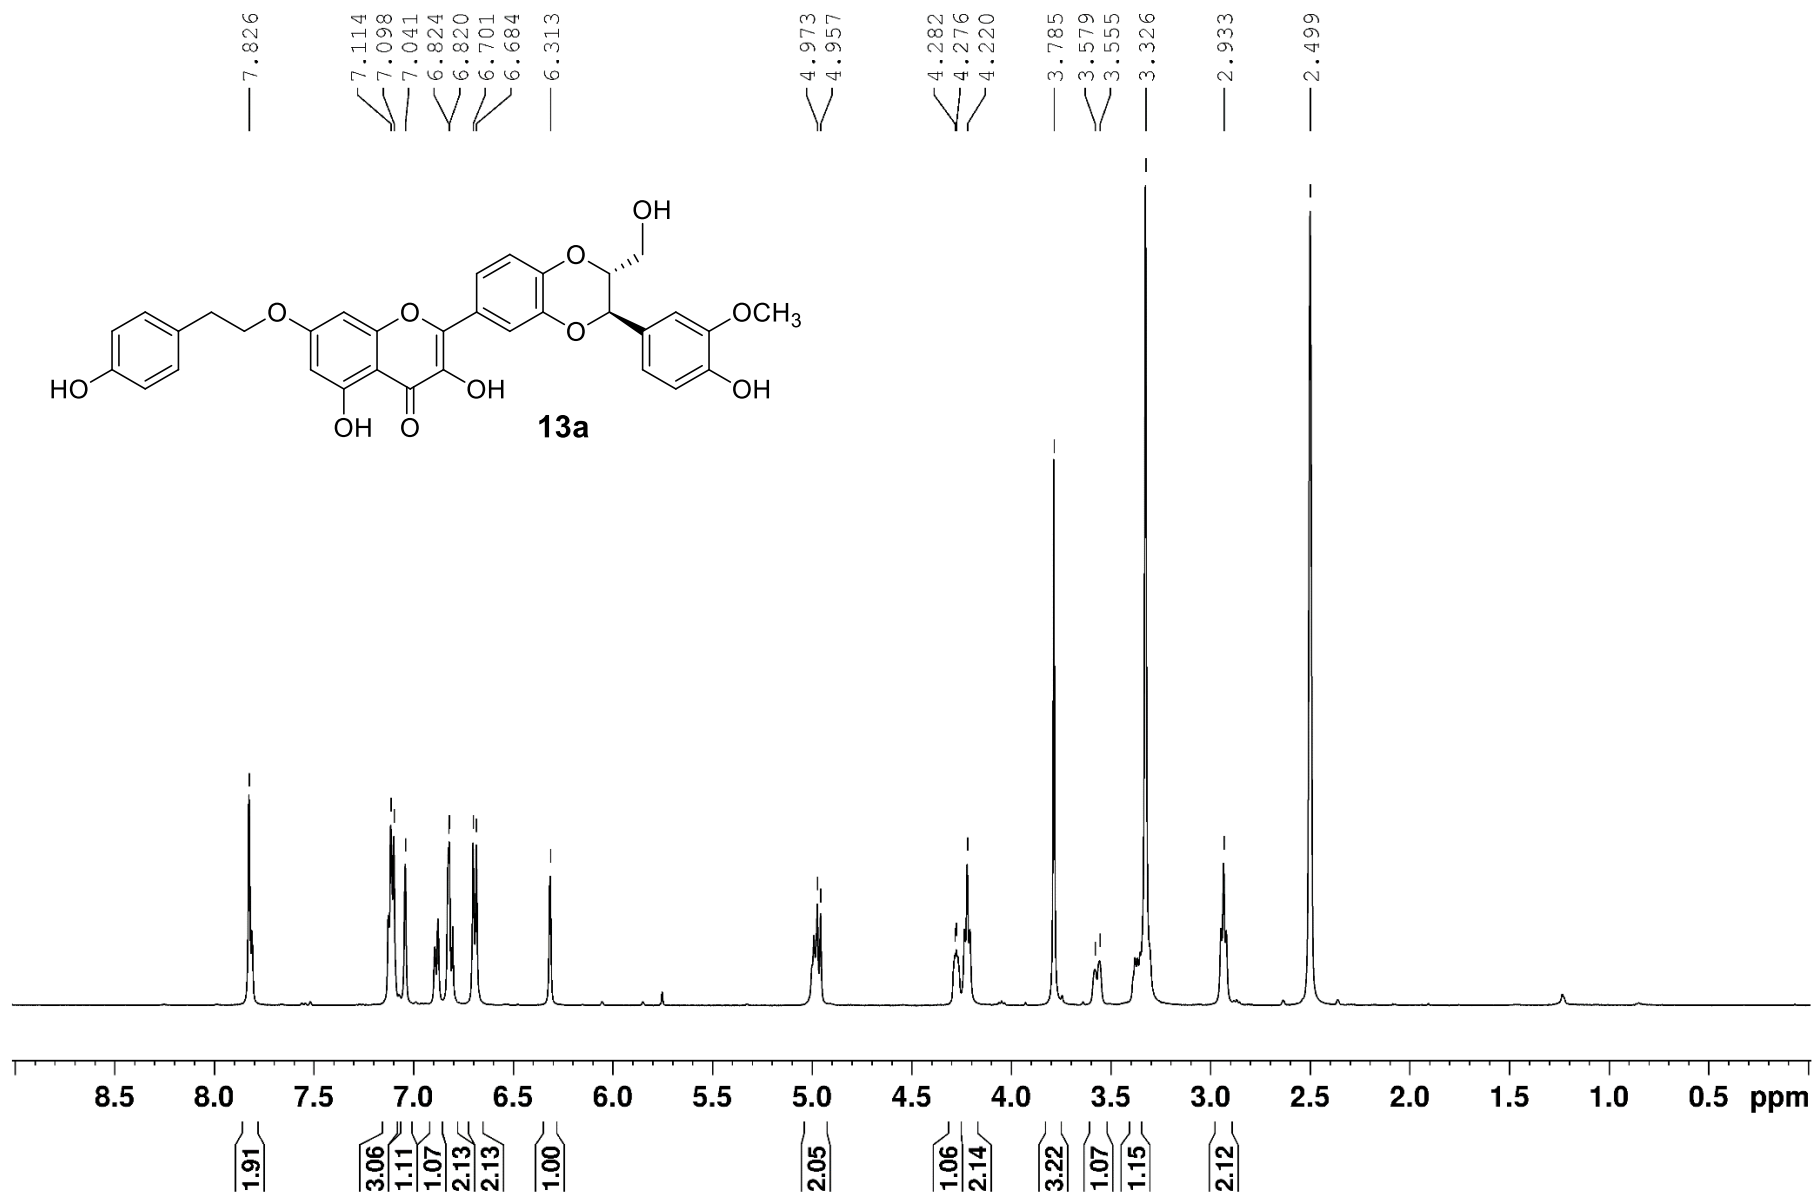

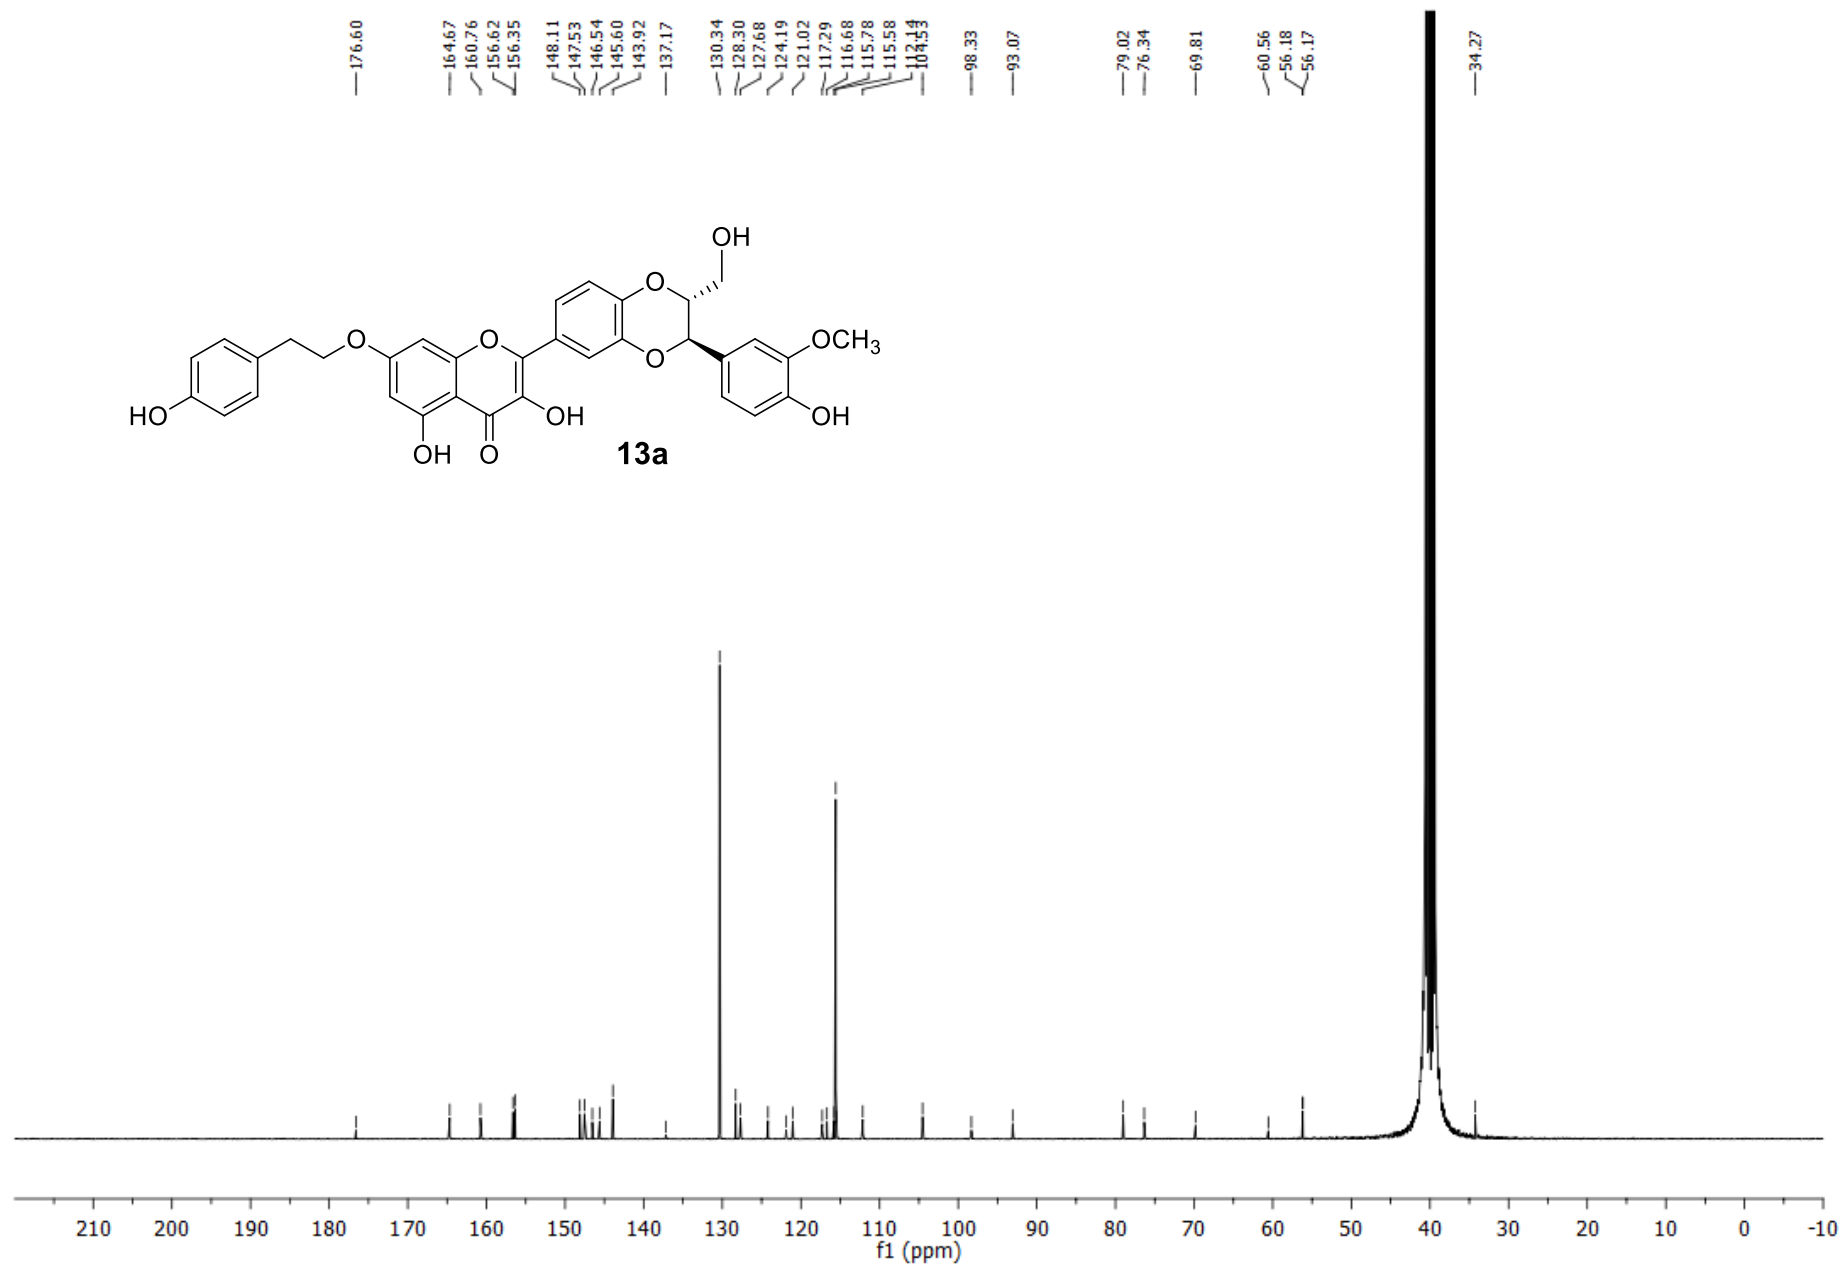

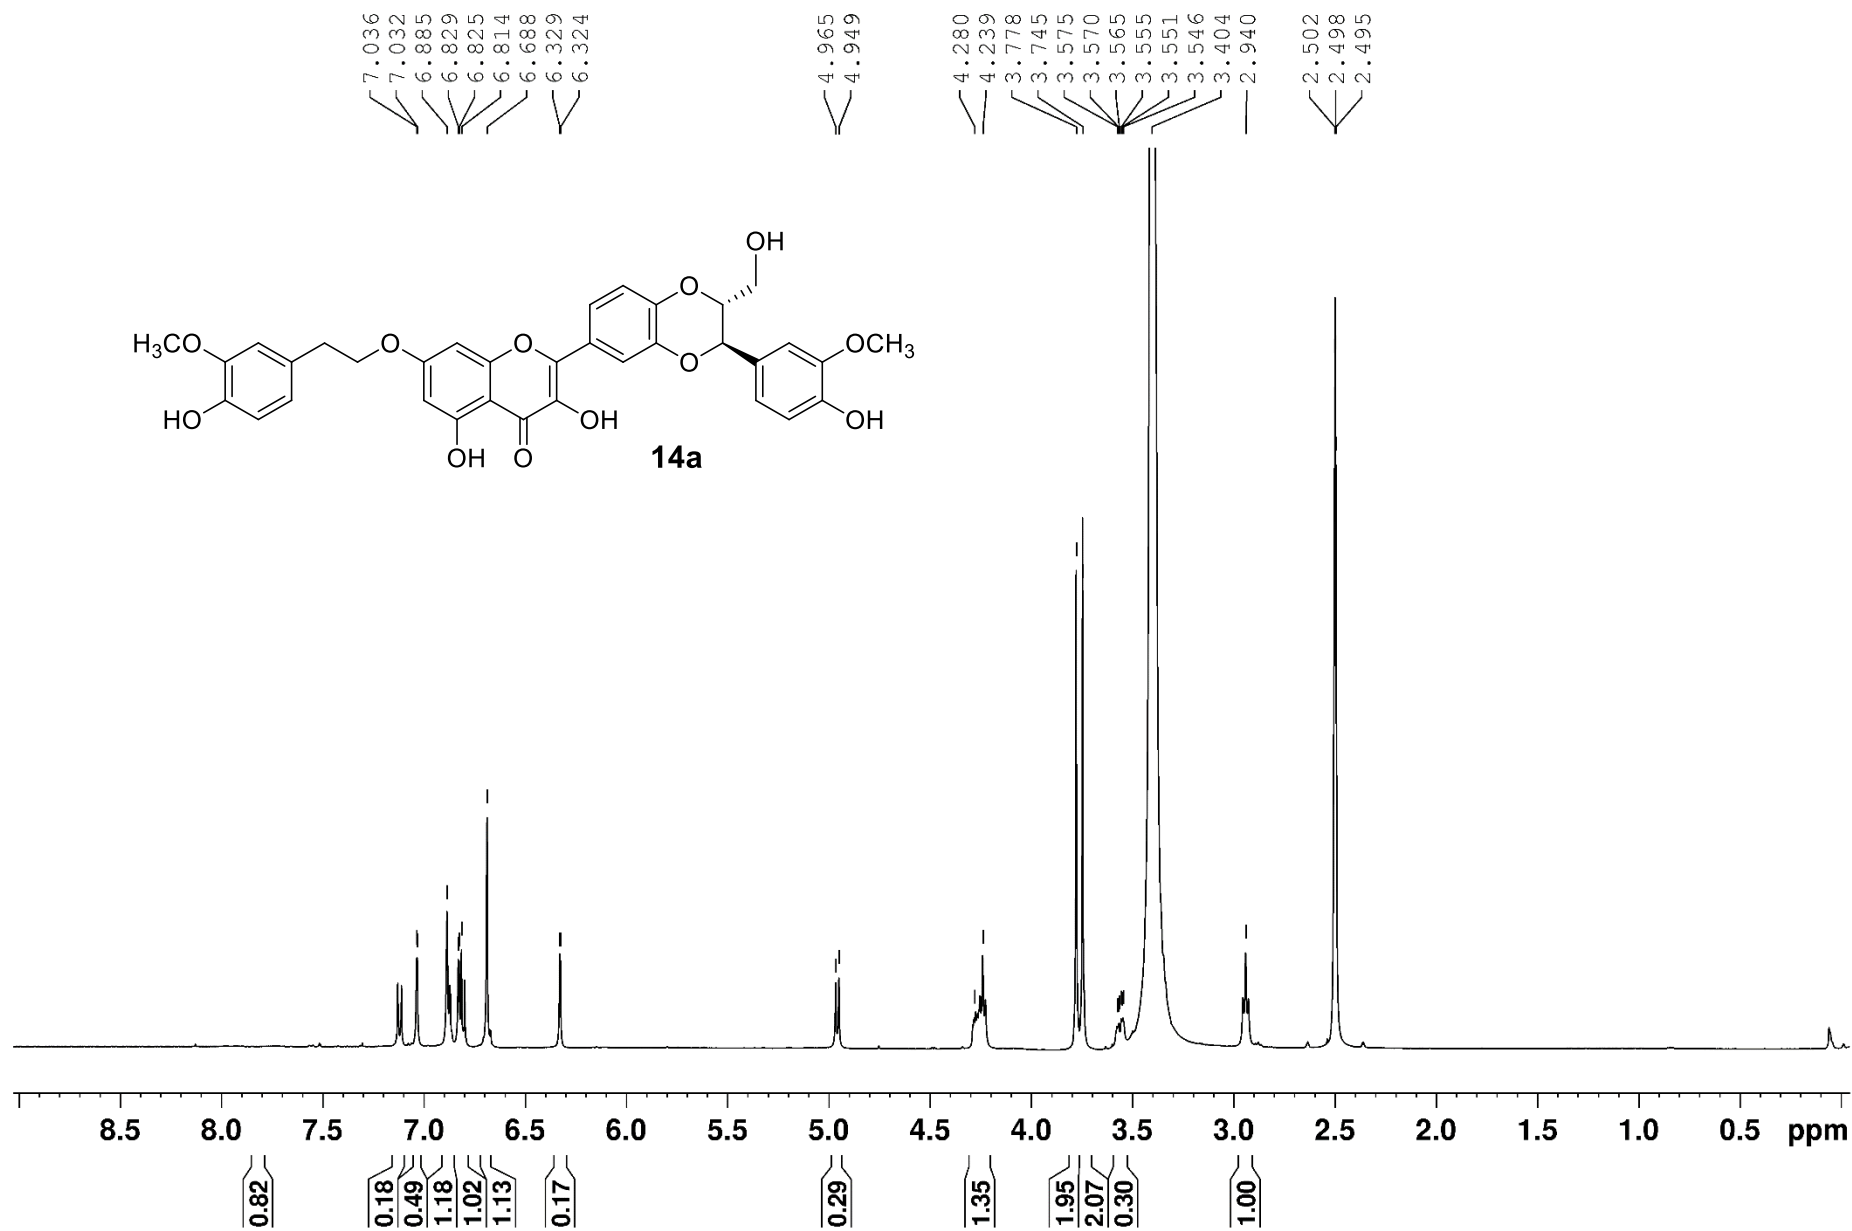

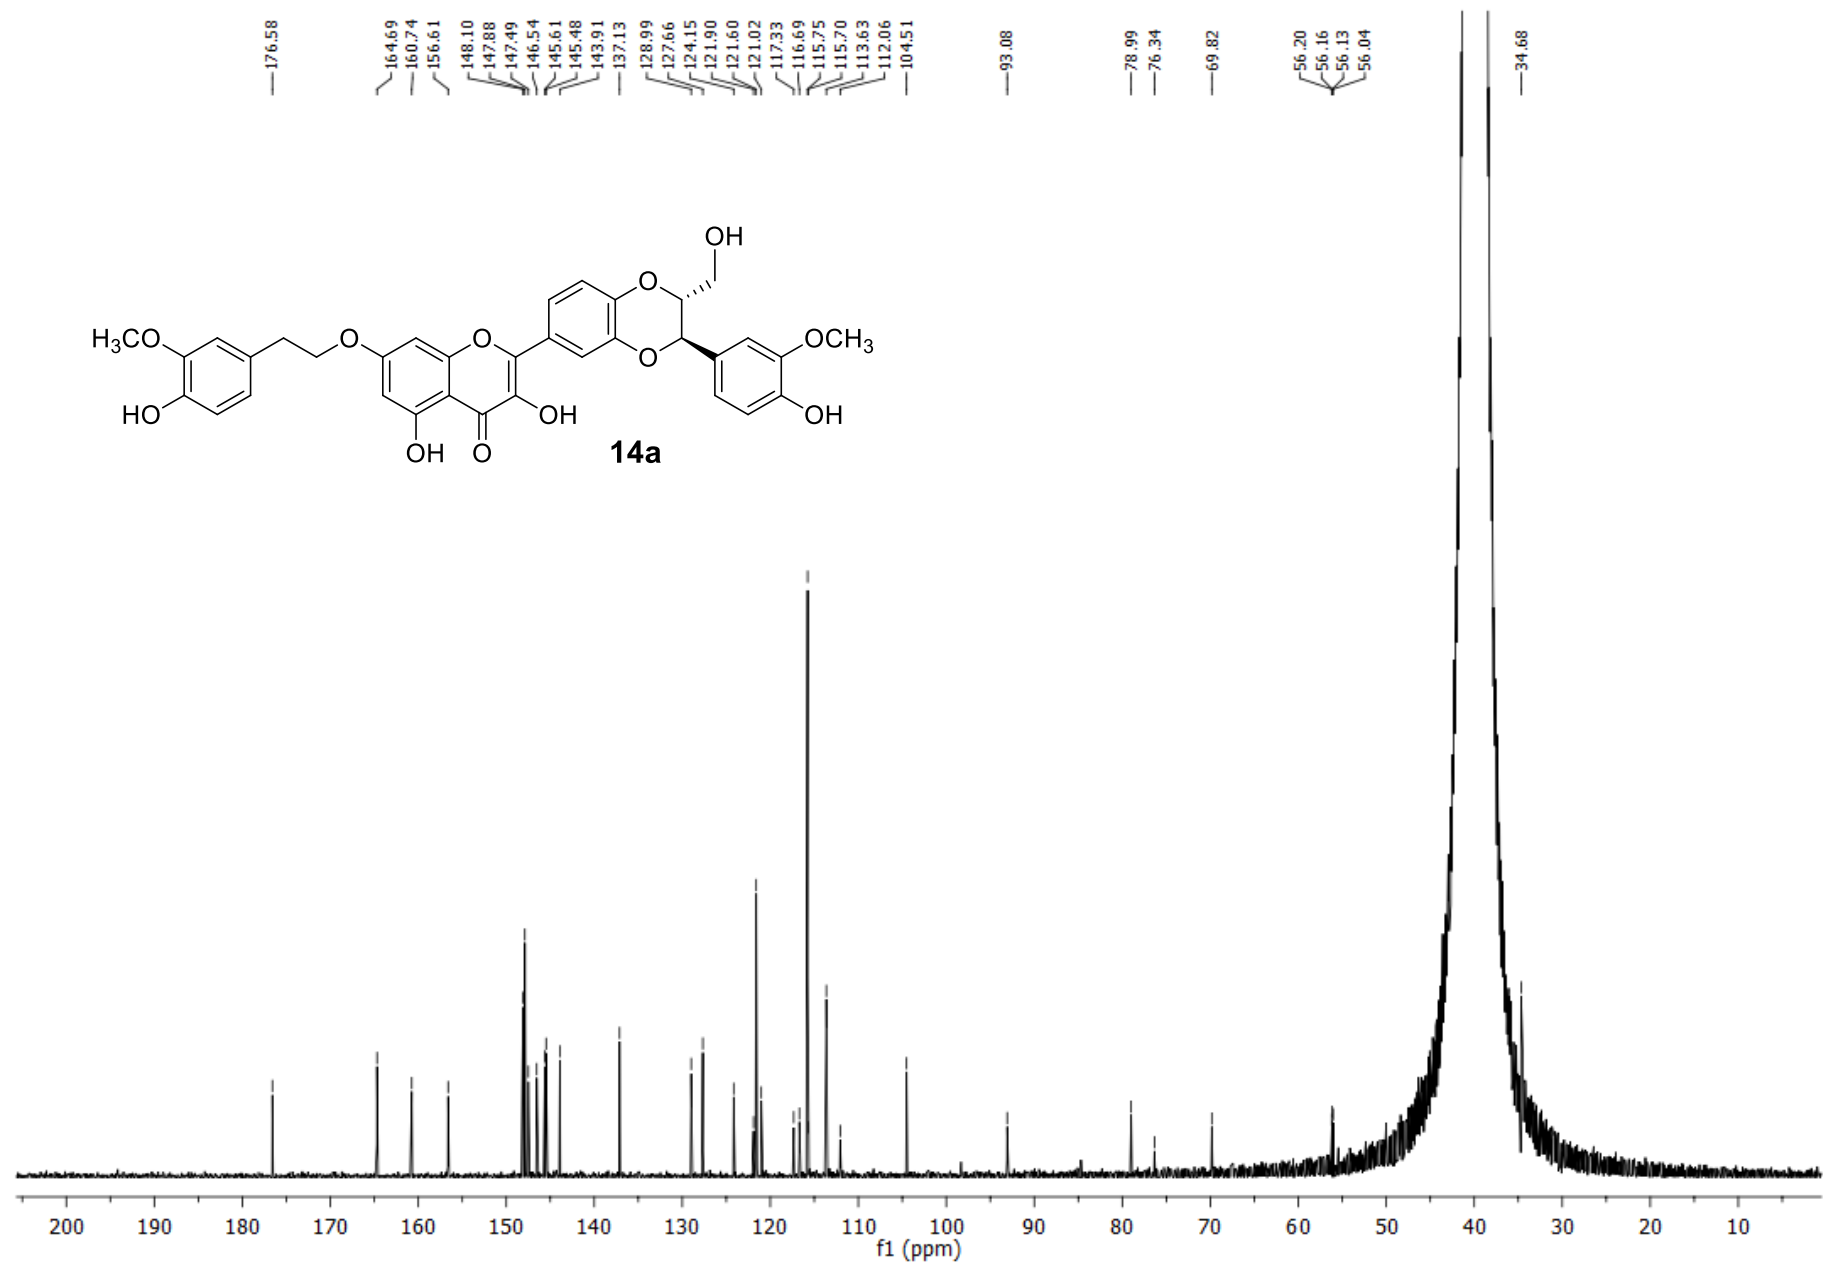



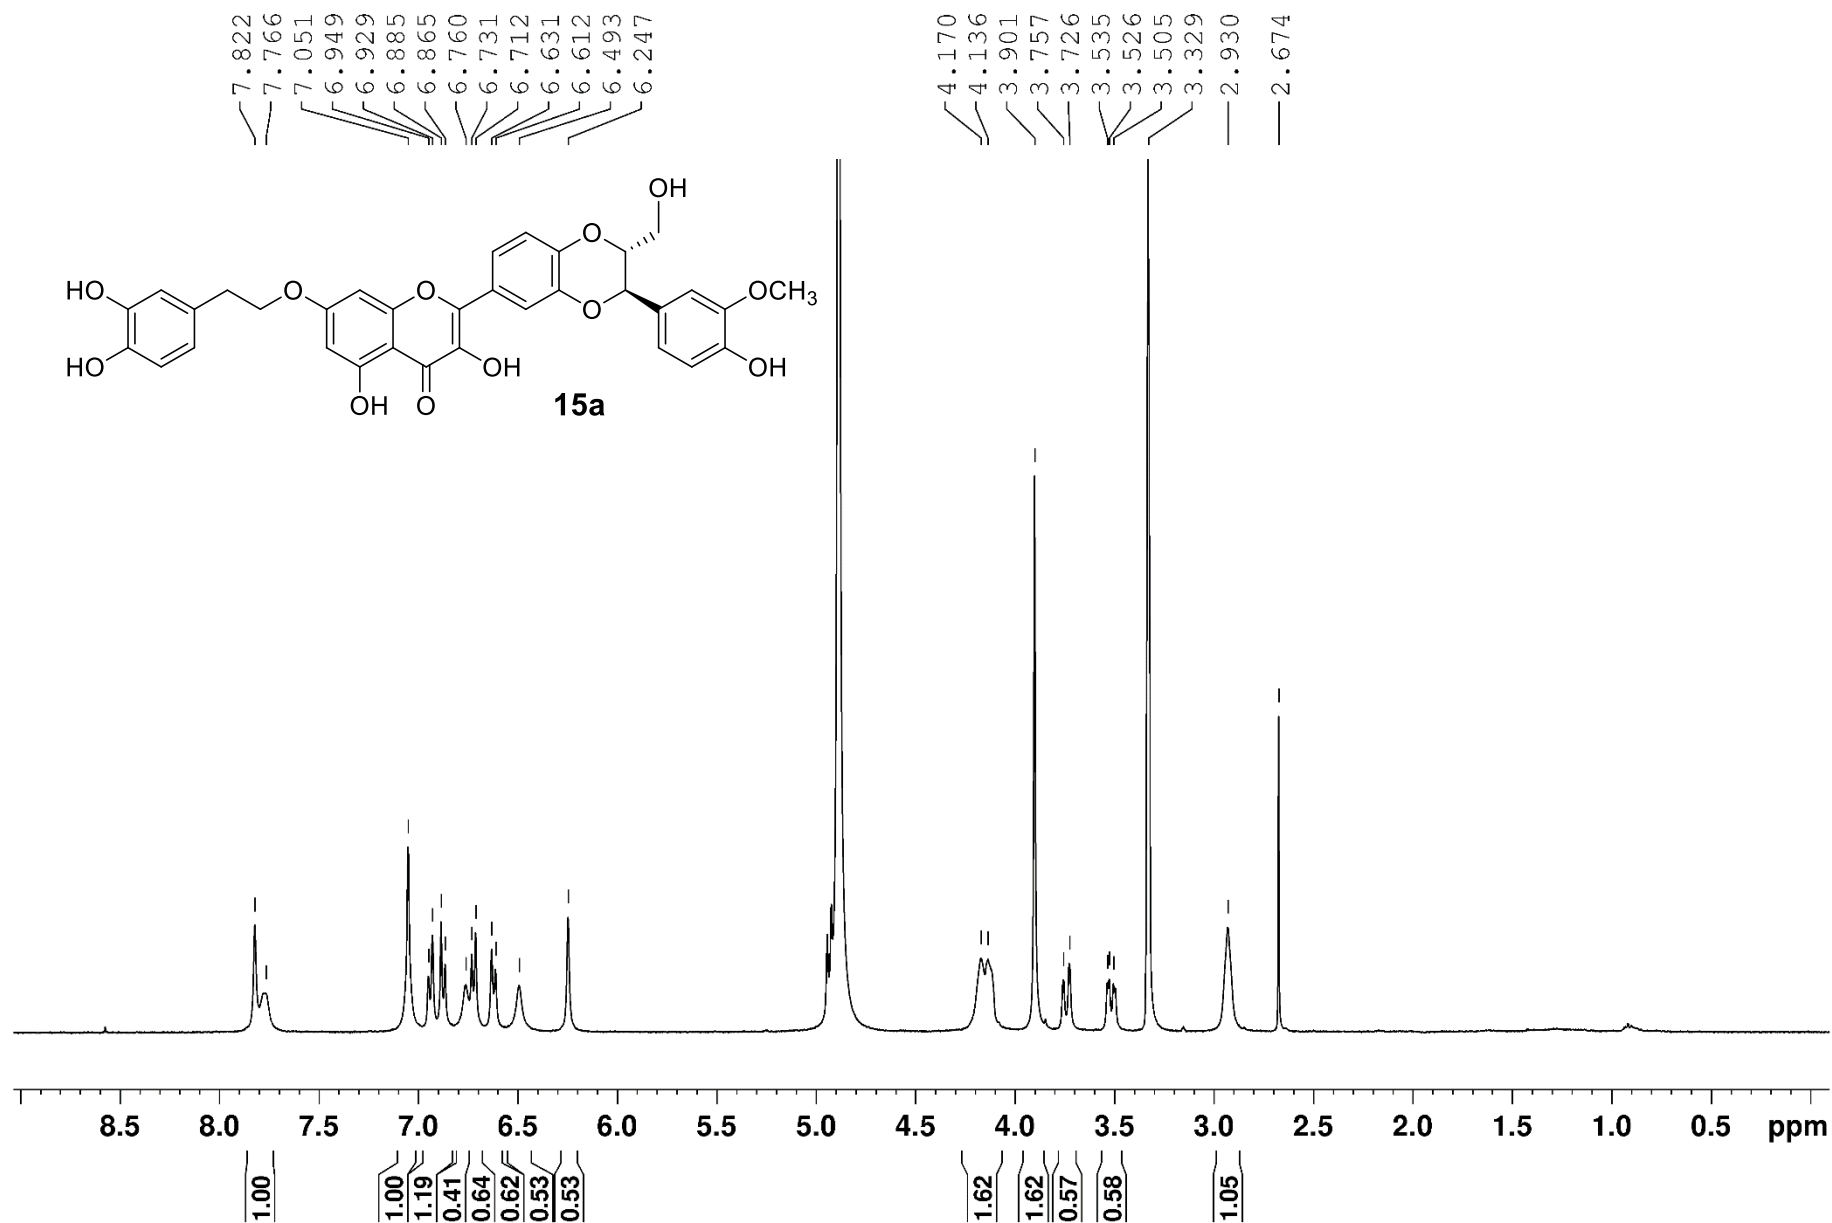

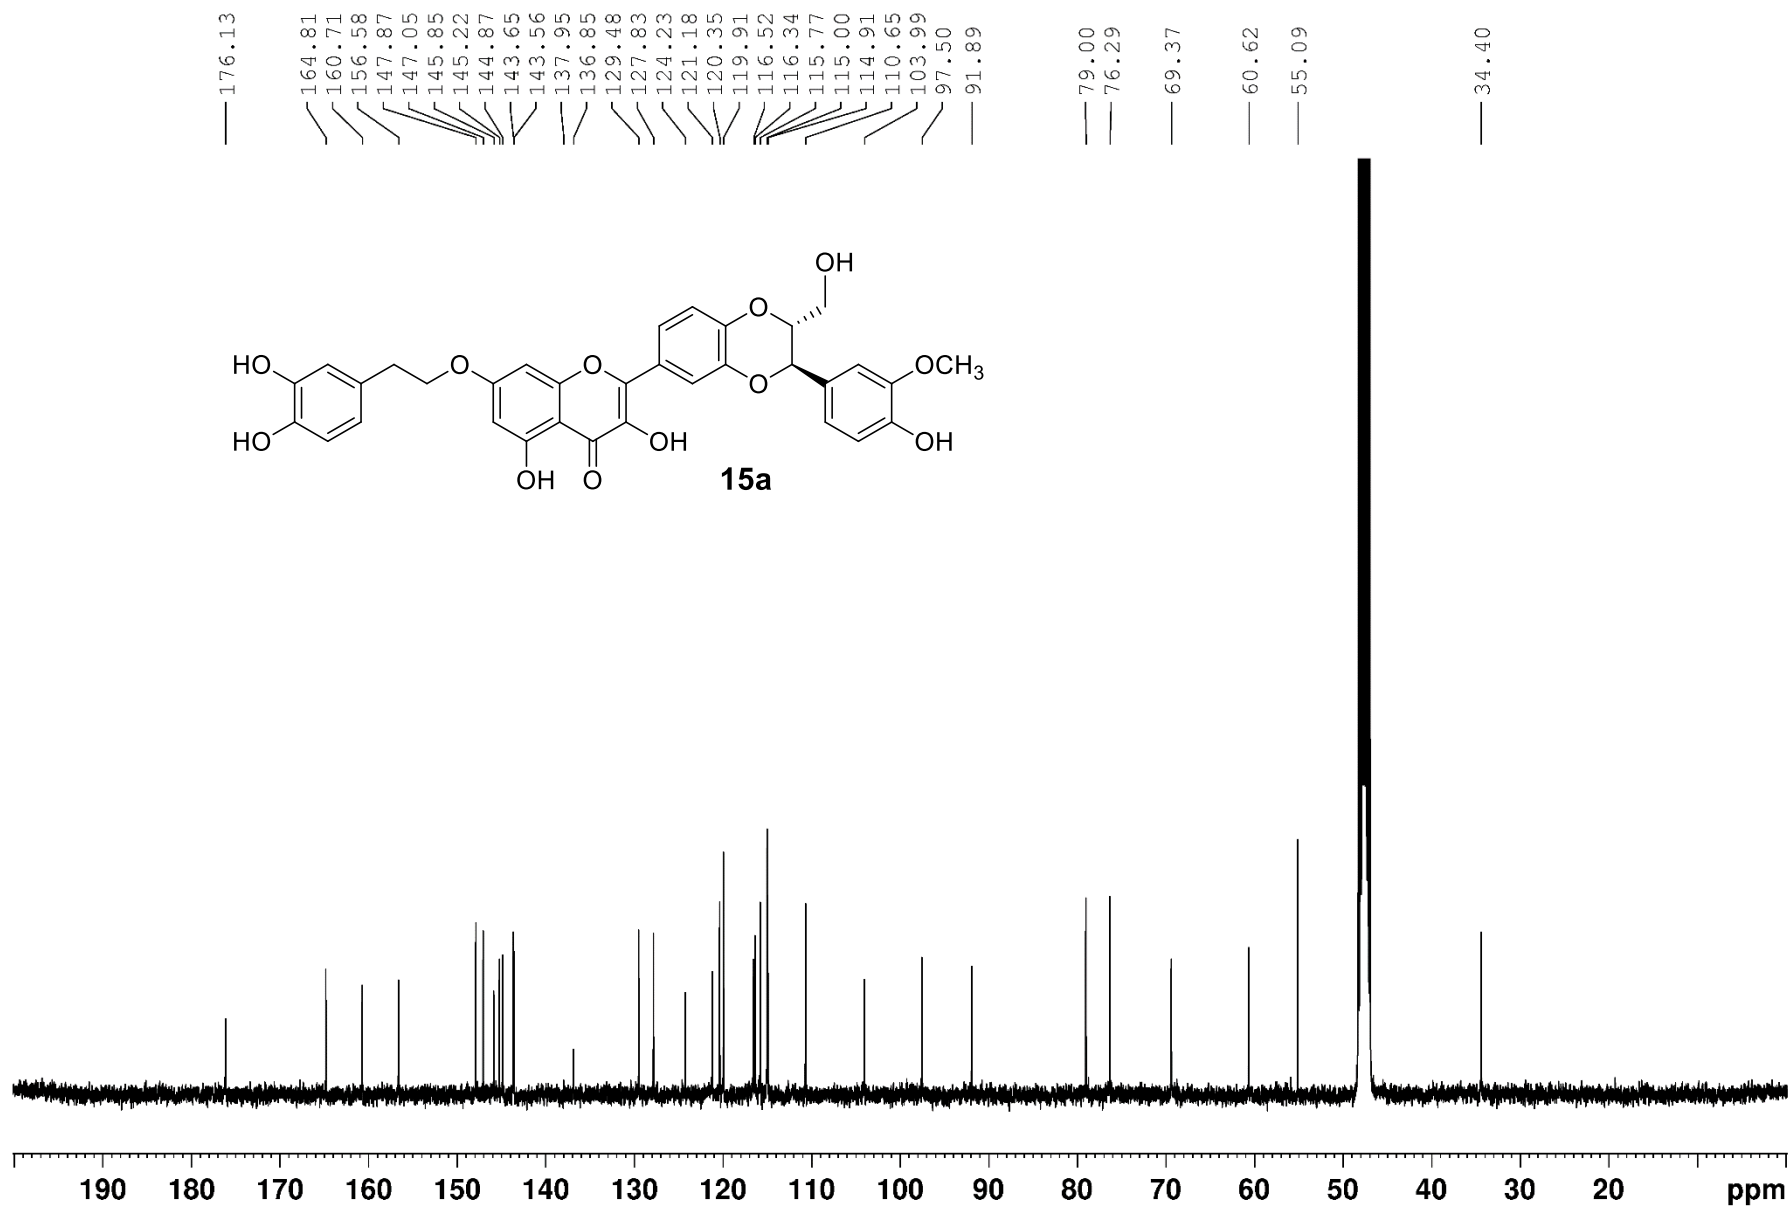

Supplement: s1 [file s1]
